# Supplementary material for: Fabrication Methods of the Polygonal Masonry of Large Tightly Fitted Stone Blocks with Curved Surface Interfaces in Megalithic Structures of Peru
Source: Preprints.org preprint supplement (doi:10.20944/preprints202108.0087.v5), 2022-03-08
Supplement: Supplementary file 1 [file supplementary]

# Способы изготовления полигональной кладки из крупных плотно подогнанных каменных блоков с криволинейными поверхностями сопряжения в мегалитических комплексах Перу

Р. В. Лапшин, к. т. н.

НИИ Физических проблем им. Ф. В. Лукина, г. Зеленоград

НИЦ Курчатовский институт, г. Москва

Эл. почта: [rlapshin@gmail.com](mailto:rlapshin@gmail.com)

В статье предложены способы создания наиболее сложной в исполнении разновидности обнаруженной в Перу полигональной кладки. Эта кладка состоит из крупных каменных блоков весом от нескольких сотен килограмм до нескольких тонн, сопрягаемых друг с другом вплотную практически без зазора через сложные криволинейные поверхности по большой площади. В работе даётся описание приёмов, которые, по-видимому, использовали строители, прибывшие из Европы. Обсуждаемые приёмы базируются на применении уменьшенной глиняной модели, 3D-пантографа, транслятора рельефа и реплик. Использование уменьшенной глиняной модели и пантографа обеспечивает не только оригинальный вид и высокое качество кладки из больших блоков, но и позволяет заметно повысить производительность труда строителей. Поскольку механизмы копирования и масштабирования трёхмерных объектов известны с начала 18 века, то и рассматриваемые каменные постройки следует датировать не ранее этого времени. Остальные более простые виды полигональной кладки, когда камни небольшие или сопрягаемые поверхности близки к плоскостям, или камни контактируют друг с другом по малой площади, или между камнями имеются значительные зазоры, вполне соответствуют известным способам обработки камня того и более раннего времени, и поэтому не требуют каких-то специальных объяснений.

Материал впервые опубликован 11 апреля 2021 г. в [блоге автора](#).

Ключевые слова: каменный блок, полигональная кладка, глиняная модель, пантограф, транслятор, реплика, зубило, молоток, мегалит, Инки, Куско, Ольянтайтамбо, Мачу-Пикчу, Саксайуаман, Перу

Copyright © 2021-2022 Р. В. Лапшин, лицензия Creative Commons Attribution

## 1. Введение

Полигональная кладка – это разновидность кладки из природного камня. Камни, изначально имеющие произвольную форму, обрабатываются так, что образуют на лицевой стороне постройки плотно прилегающие друг к другу неправильные многоугольники (полигоны).<sup>1</sup> Отметим сразу, что название “полигональная кладка” в большой степени условное. Дело в том, что существует множество построек, относимых к полигональным, в которых каменные “многоугольники” помимо прямолинейных содержат и криволинейные участки. К особенностям полигональной кладки относится то, что она не требует связующего раствора (сухая кладка). Полигональная кладка обладает достаточной прочностью и устойчивостью, чтобы выдерживать землетрясения средней силы.<sup>2,3,4,5</sup>

В настоящей работе рассматриваются полигональные кладки в мегалитических постройках, расположенных на территории современного Перу. Основное внимание уделено кладкам, которые состоят из крупных каменных блоков весом от нескольких сотен килограмм до нескольких тонн, сопряжённых друг с другом практически без зазора через криволинейные поверхности большой площади. Остальные более простые виды полигональной кладки, когда камни небольшие или сопрягаемые поверхности близки к плоскостям, или камни контактируют друг с другом по малой площади, или между камнями имеются значительные зазоры, вполне соответствуют давно известным способам обработки камня и поэтому никакого специального объяснения не требуют.

Основной строительный материал тех лет – это глыбы и блоки скальной породы случайной (произвольной) формы. Как правило, данный строительный материал не нужно было добывать (выламывать в карьерах), поскольку он был представлен повсюду в виде многометровых отложений горных обломков, образованных у подножия гор в результате обвалов и оползней. В большинстве случаев этот материал не нужно было даже ниоткуда

транспортировать, так как строили обычно в тех местах, где материал уже имелся в большом достатке. Если мегалитическое сооружение располагалось на вершине горы, то и в этом случае материал для строительства брался (выламывался) здесь же на месте. Именно поэтому, например, верхушка горы, где расположен комплекс построек Мачу-Пикчу, срезана, а верхушки соседних гор, где никто не живёт, острые.

В целом полигональная кладка ни есть что-то небывалое, такая кладка применялась в Европе с античных времён.<sup>5,6</sup> В перуанском варианте поражает только качество выполненных криволинейных стыков, которое даже в наше время повторить непросто. Предлагаемые как со стороны научного и инженерного сообщества,<sup>7,8,9,10,11</sup> так и со стороны энтузиастов<sup>12,13,14,15</sup> способы изготовления перуанской полигональной кладки не объясняют всех наблюдаемых её особенностей и часто далеки от реальности.

Предлагаемые автором способы изготовления полигональной кладки базируются на применении уменьшенной глиняной модели, 3D-пантографа<sup>16</sup> (см. разделы 2.1, 2.6, 2.8), транслятора рельефа (см. раздел 2.10) и реплик<sup>7</sup> (см. раздел 2.2). Основным инструментом обработки камня выступает молоток и стальное зубило (на практике – набор стальных зубил разных видов). Использование уменьшенной глиняной модели и пантографа обеспечивает не только известный оригинальный вид и высокое качество кладки из больших блоков, но и позволяет заметно повысить производительность труда строителей. Только благодаря высокой производительности было возможно реализовать имеющиеся в Перу объёмы полигонального строительства за приемлемое время, привлекая разумное количество рабочей силы.

Если внимательно присмотреться к форме камней в кладке, к местам их практически идеального сопряжения, то возникает ощущение того, что камни не обрабатывались механически, а были вылеплены. В связи с этим, многие исследователи ошибочно решили, что камни вылепливались или отливались из некой пластичной массы – искусственного гранита, бетона, извести, размягчённой нагревом горной породы и прочее.<sup>12,13,14,15</sup> В этой связи сразу возникает вопрос: Зачем производить недешёвую пластичную массу, если вокруг полно уже готового к употреблению материала – природного камня произвольной формы? Ну и совсем непонятно: Зачем пластичной массе придавать такие сложные формы? Почему бы, например, не сделать ограниченный по номенклатуре набор стандартных бетонных блоков, имеющих замковые элементы? Тем не менее, лепка в процессе полигонального строительства действительно имела место, но только это была лепка из глины уменьшенной модели будущего каменного блока, а не лепка самого блока из камня. Далее “лепнина” с помощью молотка и зубила просто переносилась с использованием пантографа на каменный блок с заданным в пантографе увеличением.

Есть и другие доводы против пластичной версии. Например, тыльная сторона многих блоков представляет собой рваный камень; отсутствуют затекания пластичной массы в межблоковые пространства внутри кладки; на каменных блоках имеются прожилки и другие особенности присущие натуральному камню.<sup>17</sup> В отличие от глины бетон,<sup>12</sup> известь, искусственный гранит не годятся для ручной лепки. Поэтому блоки, отливаемые из этих материалов, будут иметь плоские поверхности сопряжения, а также плоские лицевые и тыльные стороны, определяемые плоскими щитами используемой опалубки. Таким образом, если в кладке, например, присутствуют плавные L- или U-образные выемки, то, скорее всего, данная кладка не была изготовлена общепринятым в строительстве способом литья (см. дополнительно раздел 2.1.1).

Любые изделия, полученные литьём/“лепьем”<sup>15</sup>, в процессе сушки претерпевают усадку. Усадка современного бетона может достигать 3%, усадка извести заметно больше. Усадка отливки ведёт к уменьшению её размеров, короблению (изменению формы) и, как следствие, к растрескиванию. Таким образом, наличие трещин может являться одним из признаков литья. Вызванное усадкой уменьшение размеров отливки, в свою очередь, приводит к появлению зазоров между блоками. Поскольку исходная форма блоков в по-

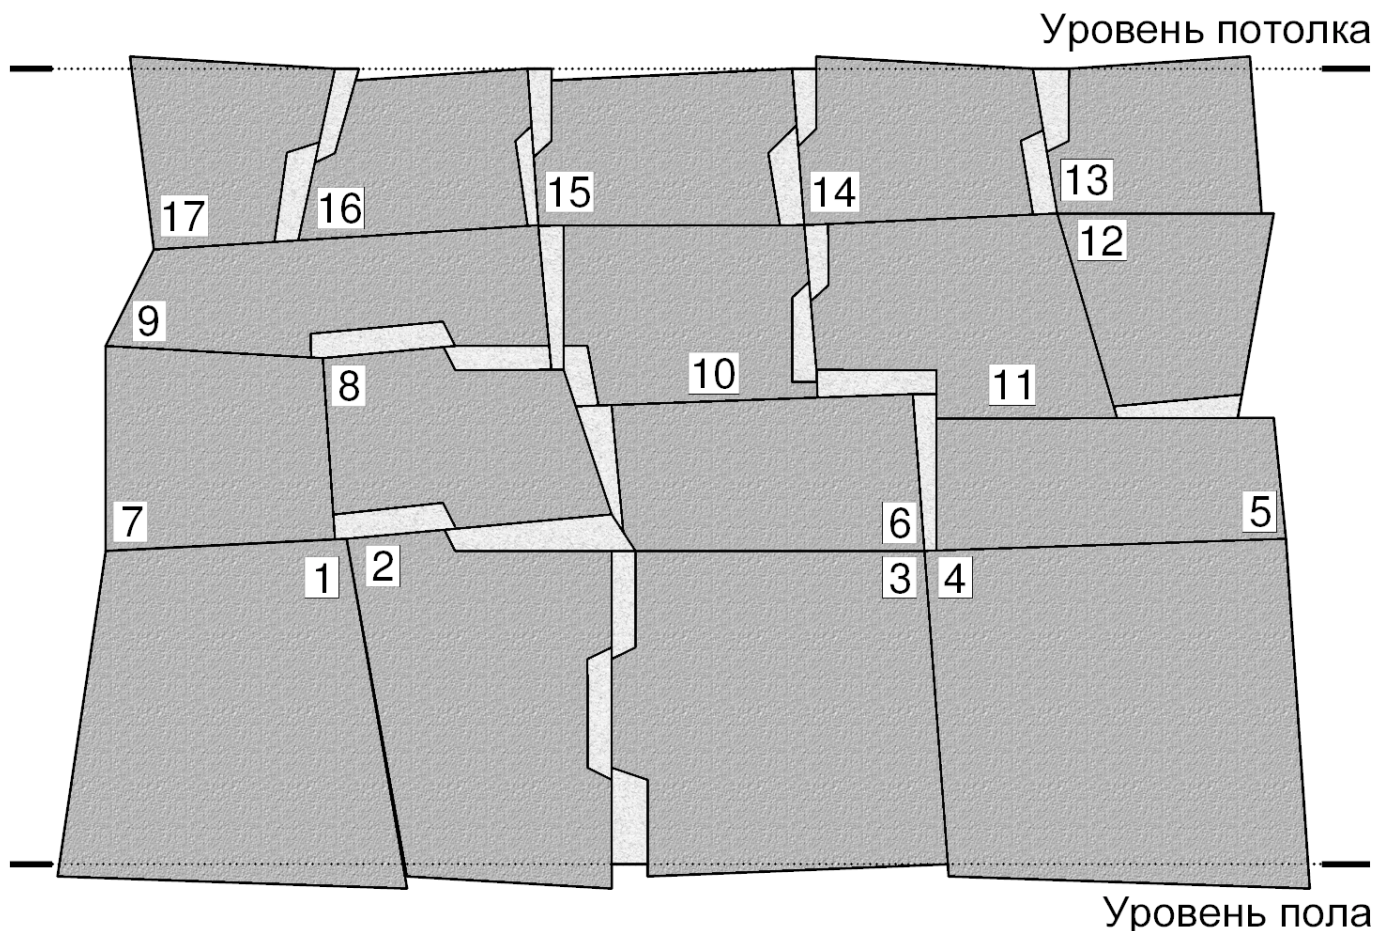

Рис. 1. Вероятный вид полученной литъём полигональной кладки из больших плотно прилегающих друг к другу блоков. Небольшие блоки, отливаемые на завершающем этапе, предназначены для выборки межблочных зазоров, возникающих из-за усадки бетона в больших блоках. Отклонения блоков от границ уровней пола и потолка вследствие усадки преувеличены для большей наглядности. Цифрами показан порядок установки больших блоков.

Если полигональной кладке неправильная, то усадка оказывается ещё и неравномерной. Соответственно, неравномерными (непараллельными, см. ссылку 13) будут и зазоры, возникающие вследствие такой усадки.

Таким образом, даже если отливать блоки последовательно друг за другом по месту,<sup>12,13</sup> дожидаясь каждый раз окончания усадки, то всё равно полностью исключить зазоры между блоками не получится. Для бетонного блока без арматуры со скромными размерами 50×50 см (ширина×высота) при типичном среднем коэффициенте усадки современного бетона 1.5%, зазор между блоками составит 7.5 мм (!). Чем больше размеры блоков, тем больше величина их усадки, и, соответственно, тем будет больше возникающий зазор.

Примерный вид полученной литъём полигональной кладки из больших плотно примыкающих друг к другу блоков показан на Рис. 1. Вначале отливаются большие блоки. После окончания усадки из больших блоков последовательно, блок за блоком собирается полигональная кладка (порядок установки блоков показан на рисунке цифрами). Каждый блок устанавливается так, чтобы он примыкал вплотную определённой стороной к смежному ранее установленному блоку. На заключительном этапе бетоном заполняются небольшие (компенсационные) пространства между большими блоками (перед заливкой на затвердевший бетон наносится тонкий слой материала, препятствующий сцеплению свежего бетона с затвердевшим<sup>12,13</sup>). Заметим, что полигональная кладка, полученная согласно описанной технологии, в некоторых случаях может оказаться не полностью разборной.

Из представленной процедуры видно, что поверхности сопряжения в полученных литьем полигональных кладках должны быть плоскостями, а сами кладки должны иметь весьма специфический внешний вид (см. Рис. 1). Большие некраевые блоки в таких кладках находятся в контакте с соседними большими блоками только двумя своими сторонами, контакты остальных сторон происходят через небольшие блоки с малой собственной усадкой. Небольшие блоки призваны компенсировать связанные с усадкой уменьшения размеров и изменения формы больших блоков. Только при таком подходе возможно уменьшить до минимума (но не до нуля) зазоры между полученными литьем бетонными блоками.

Чем больше сторон у большого бетонного блока, тем больше требуется компенсационных вставок, тем, соответственно, сложнее становится используемая опалубка. Так как треугольных блоков в перуанских полигональных кладках нет, то наиболее простой формой блока будет в этом случае условный четырёхугольник. Условный четырёхугольник возникает, если игнорировать изменение формы большого многоугольного блока, связанные с включением в его тело компенсационных блоков. Поскольку кладок подобных изображённой на Рис. 1 в Перу не обнаружено, значит для изготовления полигональных стен из крупных плотно примыкающих друг к другу блоков методы литья в опалубку не применялись.

Помимо механической обработки камней посредством молотка и стального зубила предложенный подход также позволяет отливать крупные полигональные блоки в форму (см. раздел 2.1.1). Плотное примыкание блоков полигональной кладки в этом случае достигается благодаря высокой точности литья. Характерными признаками литья по такой технологии являются: сплошная/полая болванка из дешёвого бетоноподобного материала и сравнительно тонкая оболочка из более дорого искусственного гранита.

Так как к моменту завоевания Южной Америки европейцами индейцы не знали ни железных орудий, ни колеса, и не имели тягловых животных, то рассматриваемые постройки могли быть возведены только строителями, прибывшими из Европы (см. раздел 2.15). В отличие от индейцев строители эти обладали всеми необходимыми инструментами, механизмами и навыками масштабного строительства. Следы этого масштабного строительства из камня видны повсюду – католические соборы, монастыри, дворцы, виллы, масса городских и промышленных построек. Всякое масштабное строительство всегда подразумевает наличие соответствующей этому масштабу экономики. Поэтому в статье дополнительно объяснено, на чём базировалась экономика Перу тех лет (см. раздел 2.15). Поскольку механизмы копирования и масштабирования трёхмерных объектов известны в Европе с начала 18 века (см. раздел 2.14), то и рассматриваемые полигональные постройки следует датировать, начиная с этого времени.

## 2. Способы изготовления полигональной кладки

### ***2.1. Перенос формы глиняной модели на каменную заготовку с помощью пантографа***

На первом этапе, в соответствии с эскизом в уменьшенном масштабе изготавливается глиняная модель постройки, блоки которой образуют полигональную кладку. Пусть для определённости постройкой является просто стена. Из глины вылепливаются небольшие полигональные блоки задуманной формы. Размеры этих блоков соответствуют размерам, скажем, баскетбольного мяча или около того. Места сопряжения поверхностей формируются вдавливанием блоков друг в друга. Для уменьшения усадки внутрь глиняных блоков закладывается твёрдая сердцевина подходящей формы – камень или кусок сухой глины.

Из сырых модельных блоков собирается модель стены. В ходе сборки между блоками прокладывается материал, препятствующий слипанию блоков в процессе сушки-затвердевания. Чтобы уменьшить влияние усадки, вначале сушится нижний ряд, затем следующий за ним и т. д. При необходимости стене придаётся требуемый наклон (см.

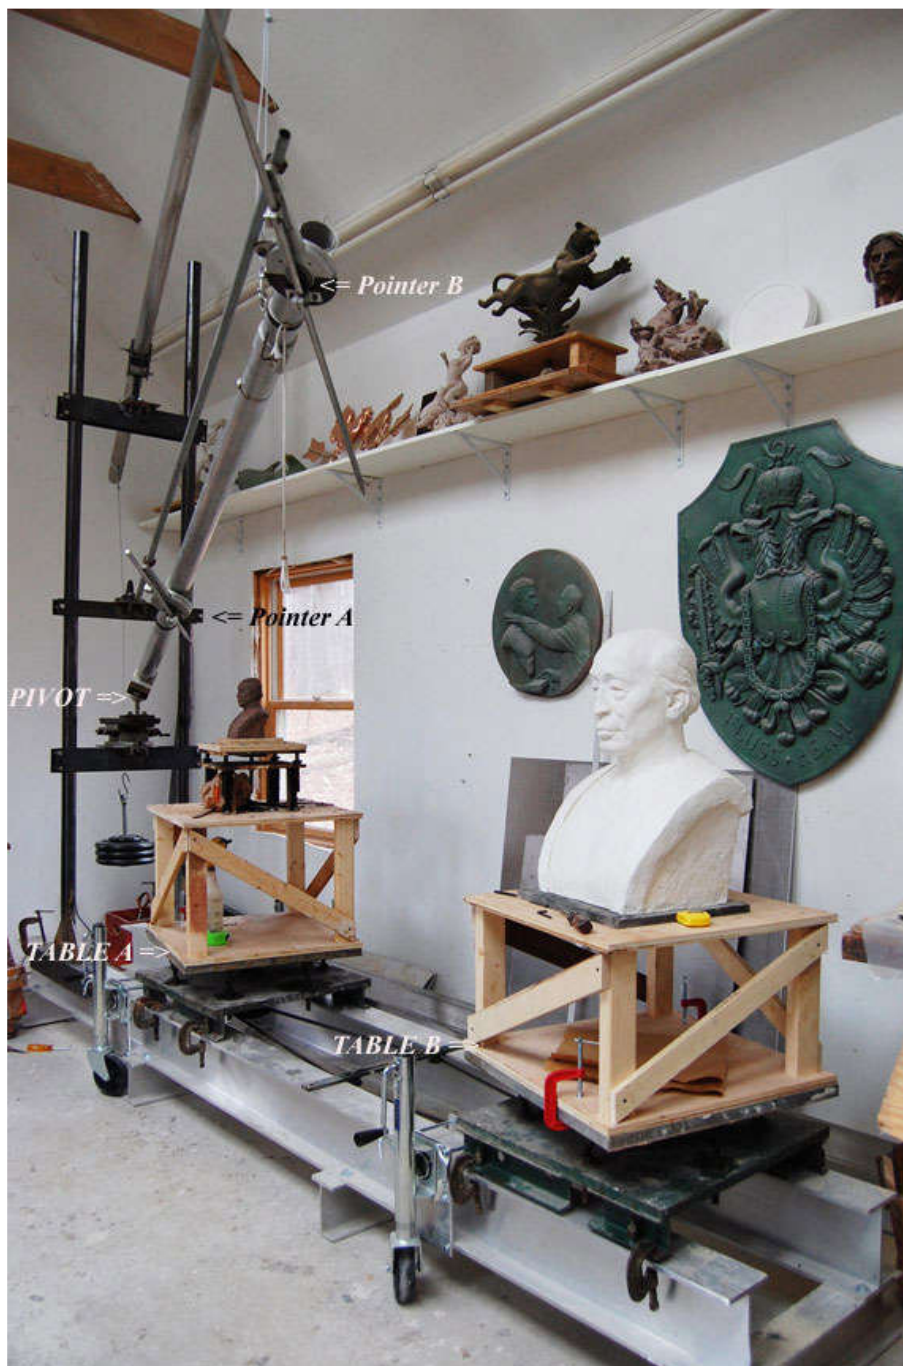

Рис. 2. Современный 3D-пантограф (М. Keropian, [www.keropiansculpture.com](http://www.keropiansculpture.com)).

раздел 2.5). В процессе сушки-усадки модельные блоки досопрягаются более точно под собственным весом и с небольшими правками строителя. Если в результате усадки между модельными блоками возникает зазор, то этот зазор устраняется нанесением на модельные блоки в месте их стыковки слоёв глины соответствующих толщин.

После затвердевания модели стены, стена разбиралась. Теперь начиналась “магия”. Средневековые европейские строители с помощью 3D-пантографа,<sup>16</sup> молотка и стального зубила переносили с заданным масштабом рельеф поверхности с небольшого модельного глиняного блока на большую каменную заготовку, подходящих размеров и формы.

Пантограф представляет собой простое шарнирно-рычажное устройство, в основе которого лежит параллелограммный механизм.<sup>18</sup> 2D-пантограф позволяет пропорционально увеличивать/уменьшать плоский рисунок.<sup>18,19</sup> Несколько более сложный 3D-пантограф<sup>20,21</sup> (см. Рис. 2), являющийся логическим развитием 2D-пантографа, позволяет пропорционально увеличивать/уменьшать объёмную фигуру, например, статую. В нашем случае с

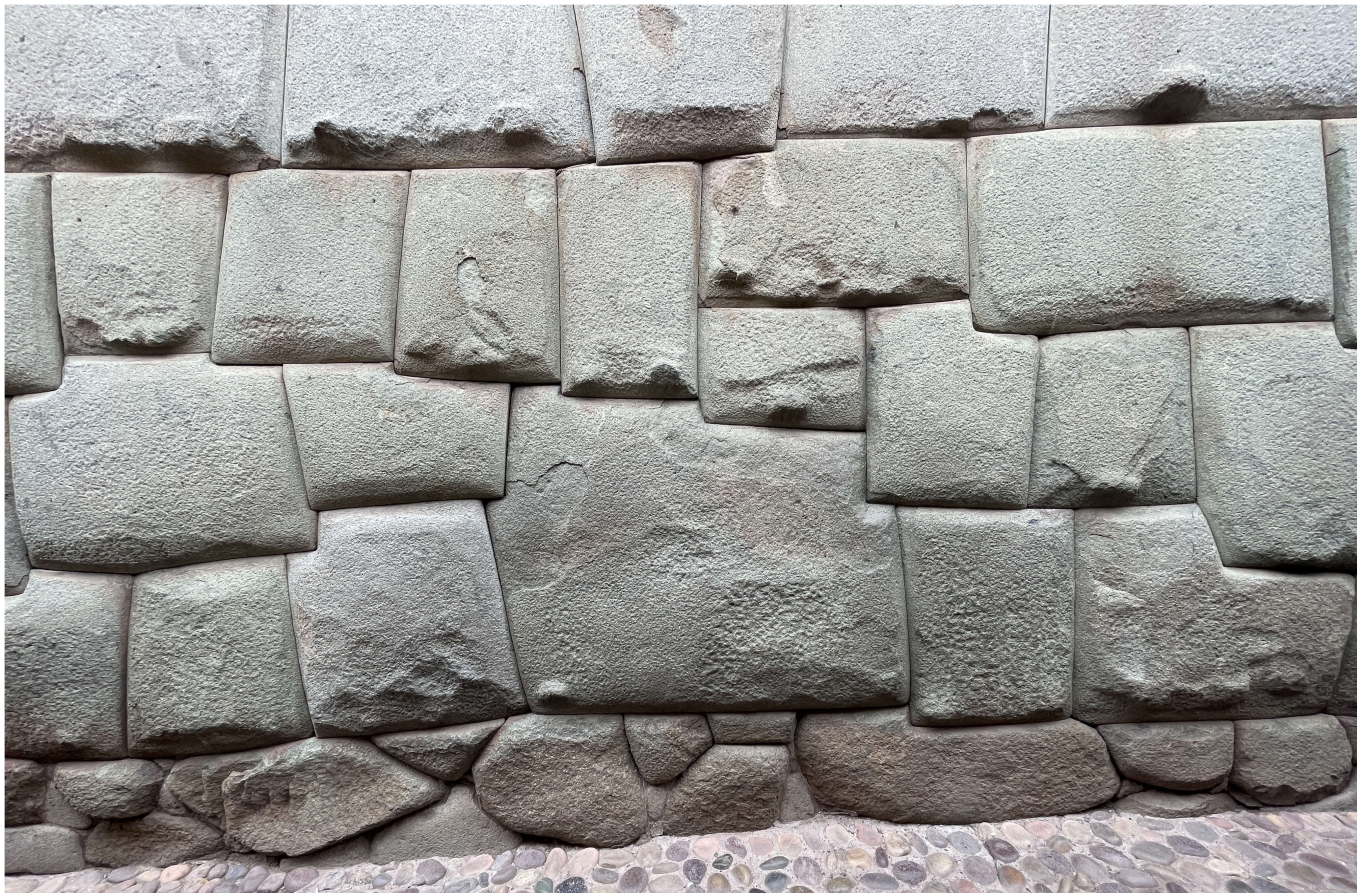

Фото. 1. Куско (В. М. Сорока, 2021).

помощью 3D-пантографа получали увеличенную копию небольшой глиняной модели блока, обрабатывая молотком и зубилом каменную заготовку.

Параллелограммный механизм расположен на стреле 3D-пантографа. Стрела крепится к раме с помощью шаровой опоры (Pivot на Рис. 2). Стрела снабжена противовесом. На одном плече параллелограммного механизма закреплён острый щуп (Pointer A), на другом – указатель (фактически такой же щуп; Pointer B на Рис. 2). Если коснуться щупом глиняной модели, то указатель покажет, где в пространстве находится соответствующая точка увеличенной копии. Коэффициент увеличения задаётся должной установкой плеч рычажной системы. Модель и её увеличенная копия располагаются каждая на своей поворотной платформе (Table A и Table B, соответственно). Платформы, благодаря цепной передаче, можно синхронно поворачивать вокруг их вертикальных осей, подставляя под щуп/указатель разные стороны 3D-объекта (модели/копии).

Минимальный размер модельного глиняного блока зависел от размера изготавливаемого каменного блока и, в конечном счёте, определялся погрешностью работы механизма пантографа. Размер модельного блока также определялся тем, насколько удобно управляться с таким блоком (лепить, править, переносить, устанавливать, сдвигать, переворачивать и т. п.) одному-двум работникам. Современные 3D-пантографы, используемые скульпторами<sup>20,21</sup> (см. Рис. 2), позволяют увеличивать модель объекта до 6 раз. Таким образом, по глиняной модели блока размером, скажем, 50×50×50 см, которую для облегчения и уменьшения усадки можно сделать пустотелой, с помощью не самого большого пантографа возможно обрабатывать каменные блоки размером до 3×3×3 м.

Отметим, что, установив на пантограф каменную заготовку, можно быстро подобрать подходящую для этой заготовки глиняную модель блока. Данная возможность крайне полезна именно в случае полигонального типа кладок, так как в таких кладках исходные блоки часто имеют сложную форму, что при подборе заготовки требует множества предварительных обмеров.

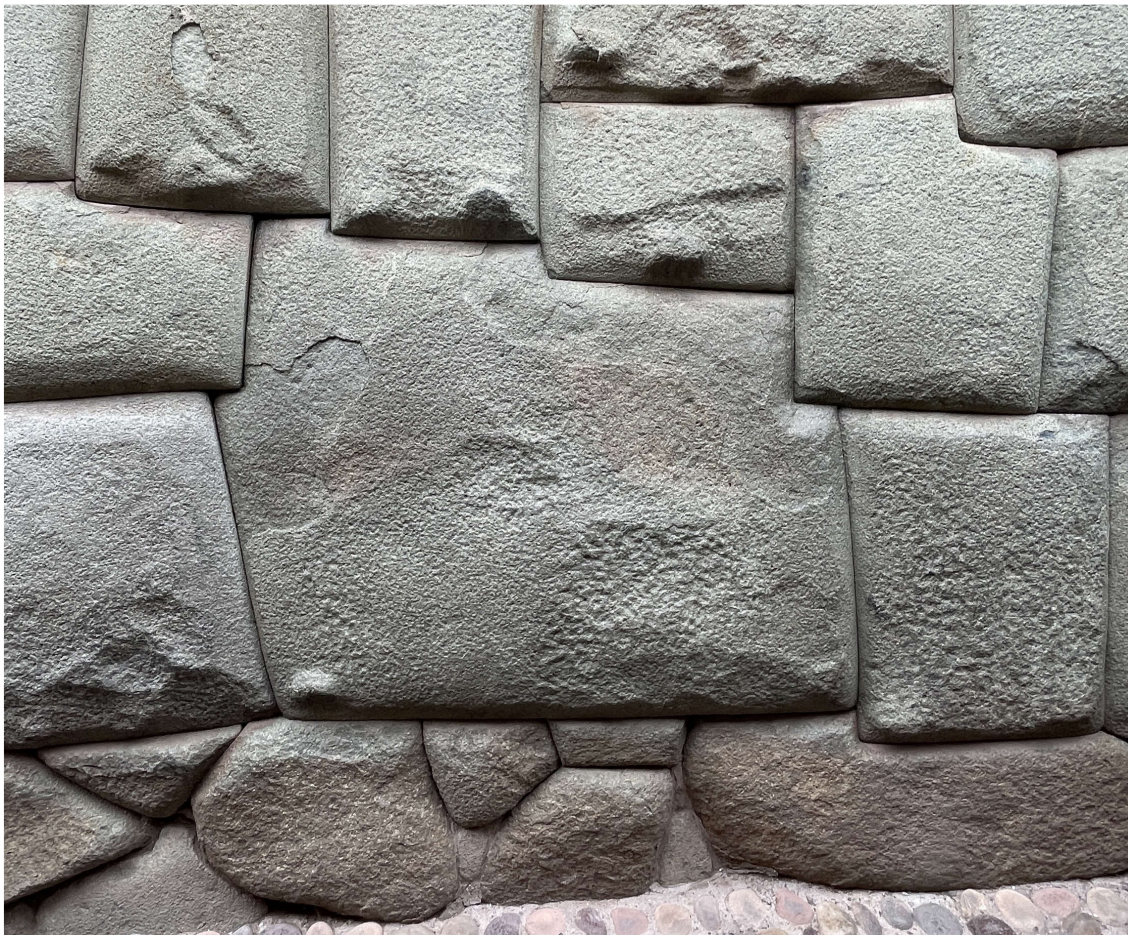

Фото. 2. Куско (В. М. Сорока, 2021).

После указанного копирования с заданным масштабом стена из каменных блоков без каких-либо подгонок собиралась с использованием катков, рычагов, блоков, лебёдок и примитивных кранов того времени.<sup>10,11</sup> Лицевая сторона каменного блока может копироваться с лицевой стороны глиняной модели, но может обрабатываться или дорабатываться после сборки полигональной постройки.

При размещении полигональной кладки на выровненном укрепленном грунте первый ряд образуют каменные блоки небольшого размера с плоским основанием, которые обрабатываются по соответствующим глиняным моделям. Каменные блоки второго ряда обычно заметно крупнее блоков первого ряда (см. для примера Фото. 1-5). Почему так? Почему большие блоки второго ряда не кладутся на такие же большие или ещё большие блоки? Для подобного устройства кладки должны быть веские причины. Ведь, чем выше располагается большой тяжёлый блок, тем выше центр тяжести, тем менее устойчивой будет стена. К тому же несущая способность маленьких камней меньше, чем больших.

В качестве примера рассмотрим стену на улице Атунрумийок (Natunrumiyoc) в Куско (см. Фото. 1-5). Так как улица имеет уклон, то можно подумать, что небольшие камни в основании больших блоков стены нужны для учёта этого уклона. Однако у этой же стены имеются участки полигональной кладки, где один ряд камней расщепляется на два или два ряда сливаются в один. Например, на Фото. 1, если двигаться слева направо, второй и третий ряды сливаются в один – второй ряд, а четвёртый ряд расщепляется на два ряда – третий и четвёртый. Таким образом, мы видим, что, уклон улицы всегда можно было учесть, используя приём со слиянием/расщеплением рядов кладки.

На самом деле всё просто. Только подсыпая грунт под небольшие блоки первого ряда и подкладывая под них мелкие камушки, играющие роль клиньев, возможно выбрать боковые зазоры между большими каменными блоками второго ряда, т. е. правильно расположить эти блоки относительно друг друга. Только при условии правильного относительного

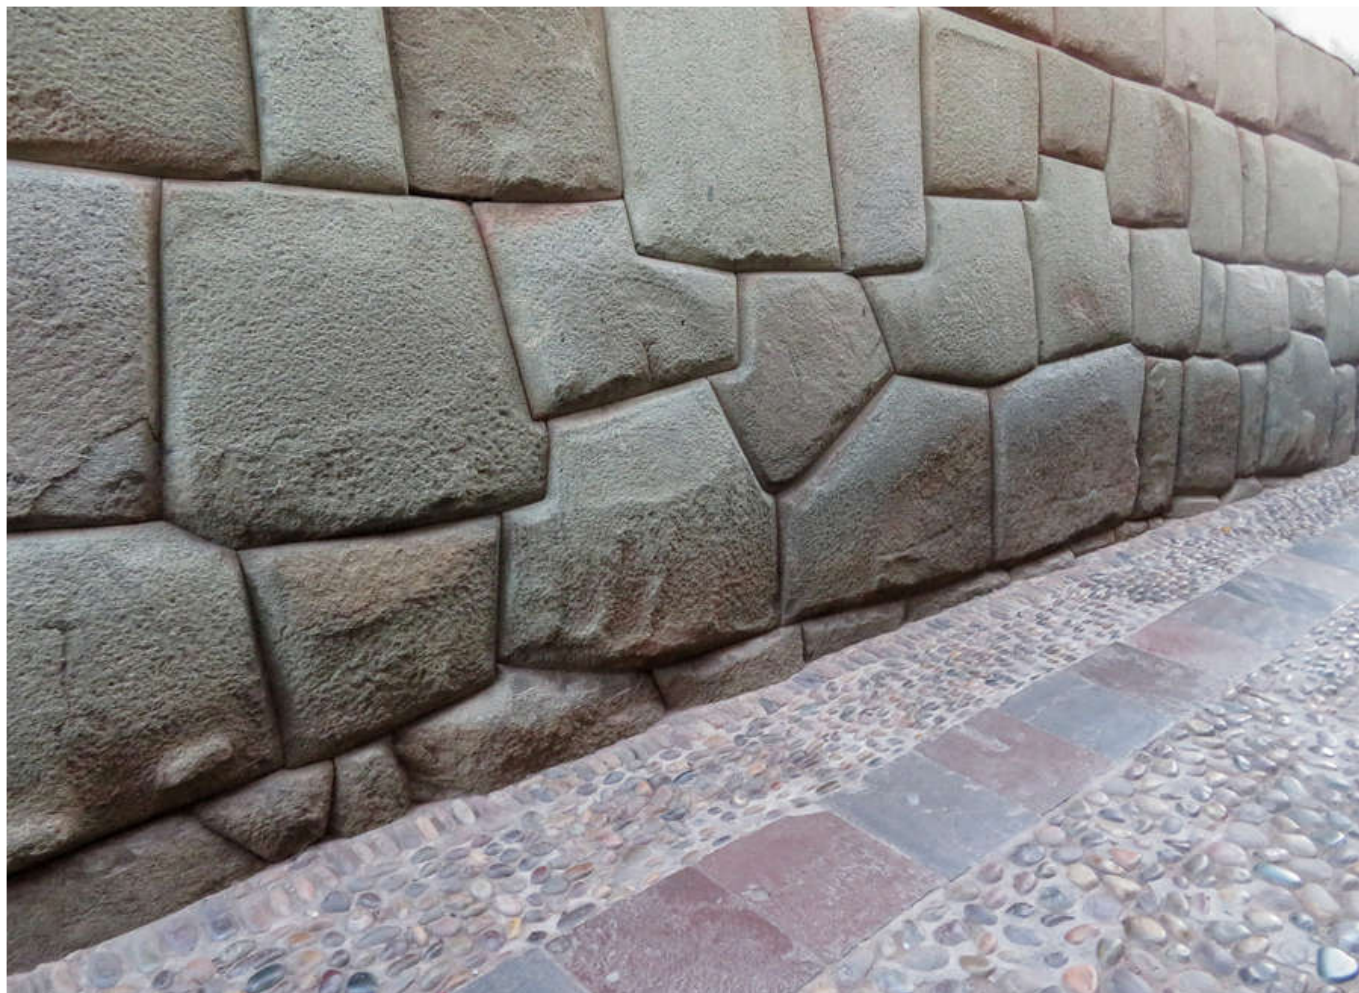

Фото. 3. Куско (С. Н. Козинцев, photo.sirano.info).

расположения больших блоков все остальные вышерасположенные ряды можно уложить с минимальными зазорами.

Указанная особенность является ещё одним подтверждением того, что стенка из полигональных блоков рассматриваемого типа не строилась ряд за рядом с подгонкой камней по месту,<sup>9</sup> а изготавливалась по уменьшенной глиняной модели и затем только собиралась. При строительстве ряд за рядом, первый ряд кладки всегда бы состоял из самых крупных каменных блоков, поскольку при таком подходе как посадочное место под очередной каменный блок, так и сам этот каменный блок изготавливаются последовательно по месту.

Если основание из небольших каменных блоков первого ряда выбивается из общей эстетики конкретной полигональной кладки, то оно скрывается слоем грунта (см. Фото. 5, 10). Подсыпаемый грунт под весом кладки будет уплотняться, а подкладываемые мелкие камушки-клинья могут трескаться и крошиться, тогда кладка будет “разъезжаться”. Чтобы исключить такое развитие, используются твёрдые без видимых дефектов клинящие камушки и не в одном, а в нескольких местах, грунт под постройкой хорошо уплотняется, после укладки двух первых рядов работы на данном участке останавливают и за кладкой некоторое время наблюдают и т. п.

В случае размещения полигональной кладки на скальном основании, оно предварительно подготавливается. Например, в скальном основании изготавливаются L- или U-образные выемки. Далее из глины на подготовленном участке скалы формируются небольшие блоки первого ряда, которые для облегчения их веса и уменьшения усадки делаются полыми. После сушки полноразмерные блоки извлекаются из скального основания и помещаются в пантограф на место каменной заготовки (Table B на Рис. 2). С помощью пантографа по

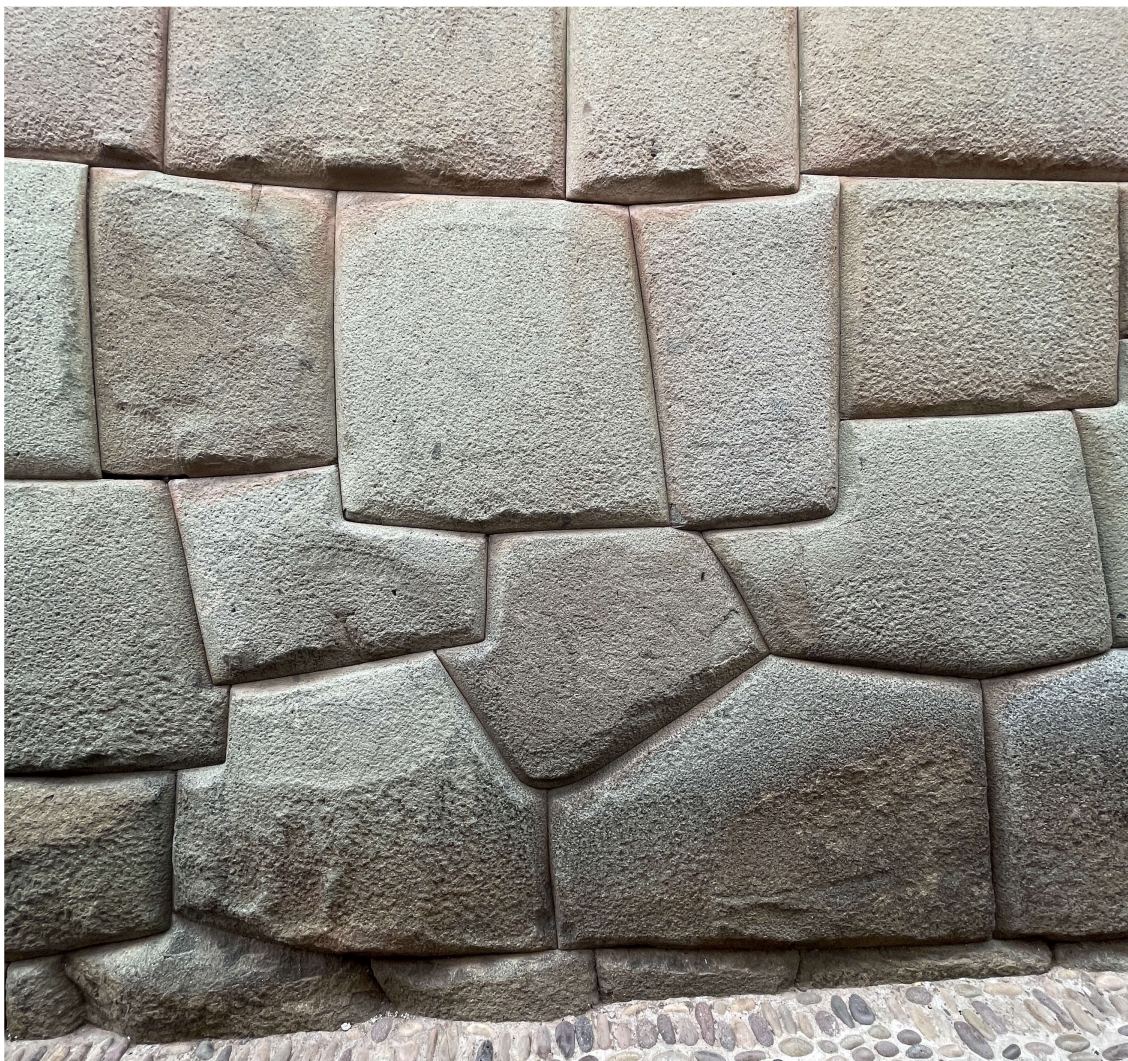

Фото. 4. Куско (В. М. Сорока, 2021).

глиняным полноразмерным блокам первого ряда изготавливаются их уменьшенные глиняные модели. Полученные модели сушатся.

Чтобы исключить повреждение нижней поверхности модельных блоков первого ряда, модельные блоки помещают в ложа с плоским основанием, вдавливая в бруски из сырой глины. Правильное взаимное положение модельных блоков первого ряда определяется по примыканию этих блоков друг к другу по боковым граням. Для уменьшения погрешности взаимного положения площади боковых граней блоков первого ряда следует стремиться делать сравнимыми с площадями оснований этих блоков. Правильное взаимное положение блоков первого ряда на месте постройки модельной стены достигается подсыпанием грунта и подкладыванием мелких клинящих камушков под ложа этих блоков.

Предложенный способ переноса геометрии с небольшой глиняной модели на большой каменный блок с помощью 3D-пантографа не требует детальной прорисовки геометрии блока. Строителю требуется фактически руками (применяя такие инструменты как стеки, шпатели, прави́ла, скребки, проволочные петли и им подобные) приблизительно вылепить сам блок и его сопряжение с соседними блоками в соответствии с общей задумкой на эскизе; затем заложить этот блок в модельную стену, где он окончательно под собственным весом и с небольшими правками строителя досопрягается с соседними модельными блоками. Никакие точные размеры при этом выдерживать не нужно.

### **2.1.1. Изготовление блоков полигональной кладки методом литья**

С помощью предложенного способа также можно получать большие блоки из бетона, извести, искусственного гранита и других материалов путём их отливки в форму. Используя

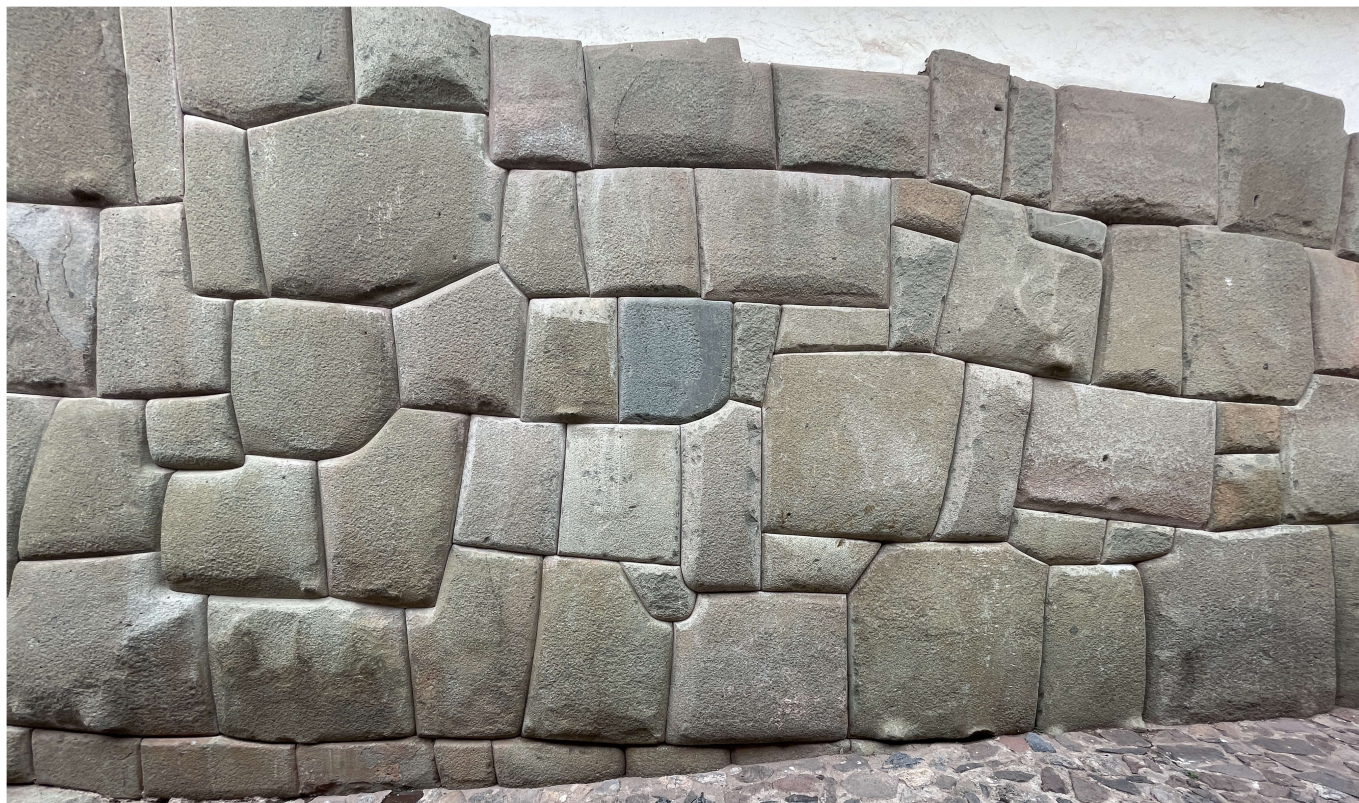

Фото. 5. Куско (В. М. Сорока, 2021).

пантограф, уменьшенную глиняную модель блока увеличивают до нужного размера. Увеличенная модель из глины для уменьшения веса и усадки делается пустотелой. Далее по увеличенной глиняной модели изготавливается литьевая форма.

Поскольку на величину межблочного зазора существенное влияние оказывает усадка, то для её уменьшения отливаемые блоки можно делать пустотелыми. Кроме того, отливаемые блоки можно делать, состоящими из двух компонентов – болванки (сплошной или полый) из дешёвого бетона и сравнительно тонкой внешней оболочки (слоя “штукатурки”) из более дорого искусственного гранита. Сначала отливается болванка. Затем, после окончания процесса усадки, поверх болванки отливается достаточно тонкая оболочка. Усадка оболочки незначительна из-за её небольшой толщины.

Увеличенные глиняные модели для полый/сплошной болванки и для внешней оболочки изготавливаются по одной и той же уменьшенной глиняной модели блока с помощью пантографа, настроенного на соответствующий коэффициент увеличения. Для повышения сцепления оболочки с болванкой на лицевой и боковой поверхностях увеличенной модели болванки создаются радиальные канавки. Канавки создаются либо непосредственно указателем пантографа (Pointer B), либо укреплённой на указателе проволоочной петлёй. Несмотря на то, что на гранитных блоках некоторых перуанских построек имеются отслоения, похожие на описанную внешнюю оболочку (см. Фото. 1-3, 5 и 15), толщины этих отслоений малы и поэтому данные отслоения скорее следует отнести к результатам естественного разрушения камня или неудачной реставрации/консервации.

Хотя предложенный способ литья и в состоянии обеспечить изготовление полигональной кладки из крупных плотно примыкающих друг другу блоков, но в сравнении со способом механической обработки является значительно более трудоёмким. Дело в том, что данный способ литья помимо уменьшенной модели требует дополнительного изготовления ещё, как минимум, двух глиняных моделей блока в натуральную величину с последующим изготовлением по этим моделям двух литьевых форм – одной для бетонной болванки, другой для оболочки из искусственного гранита.

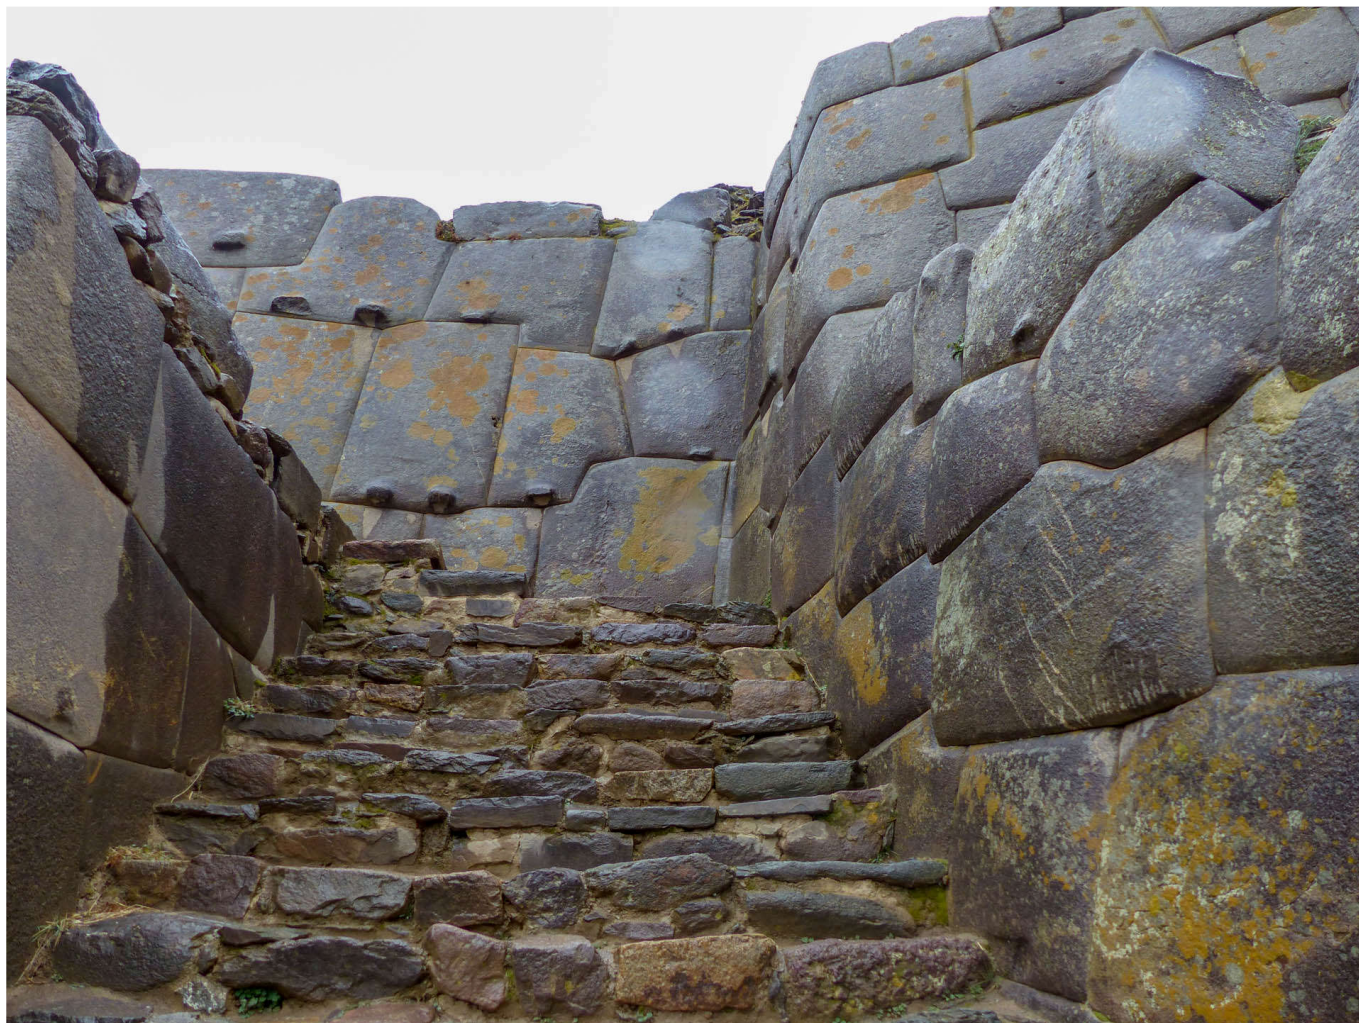

Фото. 6. Ольянтайтамбо (С. Jansen, M. Dürkop, 2016, [www.travel-badger.com](http://www.travel-badger.com)).

Способ можно упростить и удешевить, если в качестве болванки использовать грубо обработанный механически природный камень, по форме примерно повторяющий в уменьшенном масштабе форму конечного изделия. Однако, в этом случае оболочка будет иметь заведомо большую толщину, что, в свою очередь, вызовет связанное с усадкой увеличение зазоров. Более того, возникающие зазоры будут неодинаковыми из-за переменной толщины оболочки. Нужный каменный блок, выполняющий роль болванки, можно изготовить как просто по основным размерам, так и по уменьшенной глиняной модели с использованием пантографа. Тыльная сторона отливаемого блока в данном способе может не иметь наружного слоя оболочки вообще, поскольку в большинстве построек в этом месте не требуется выбирать зазор между блоками или заботиться о внешнем виде изделия.

Поскольку каменные блоки в полигональной кладке испытывают весовую нагрузку от нескольких тонн до нескольких десятков тонн, то при определённых обстоятельствах, скажем, при толчках, вызванных землетрясением, может произойти разрушение внешней твёрдой, но хрупкой оболочки из искусственного гранита. Перечисленные особенности показывают, что представленный способ литья хотя и в состоянии обеспечить требуемый результат (небольшие зазоры), но для целей строительства слишком сложен и дорог, и не гарантирует необходимой долговечности постройки в сейсмоопасном регионе.

## **2.2. Использование реплик**

Не очень сложные сопряжения крупных блоков выполнялись с использованием реплик. Из глины выдавливался/раскатывался “блин” постоянной толщины. Сырой блин укладывали на каменный блок, реплику поверхности которого нужно было изготовить. После затвердевания реплику-блин снимали. Периодически прикладывая полученную лёгкую реп-

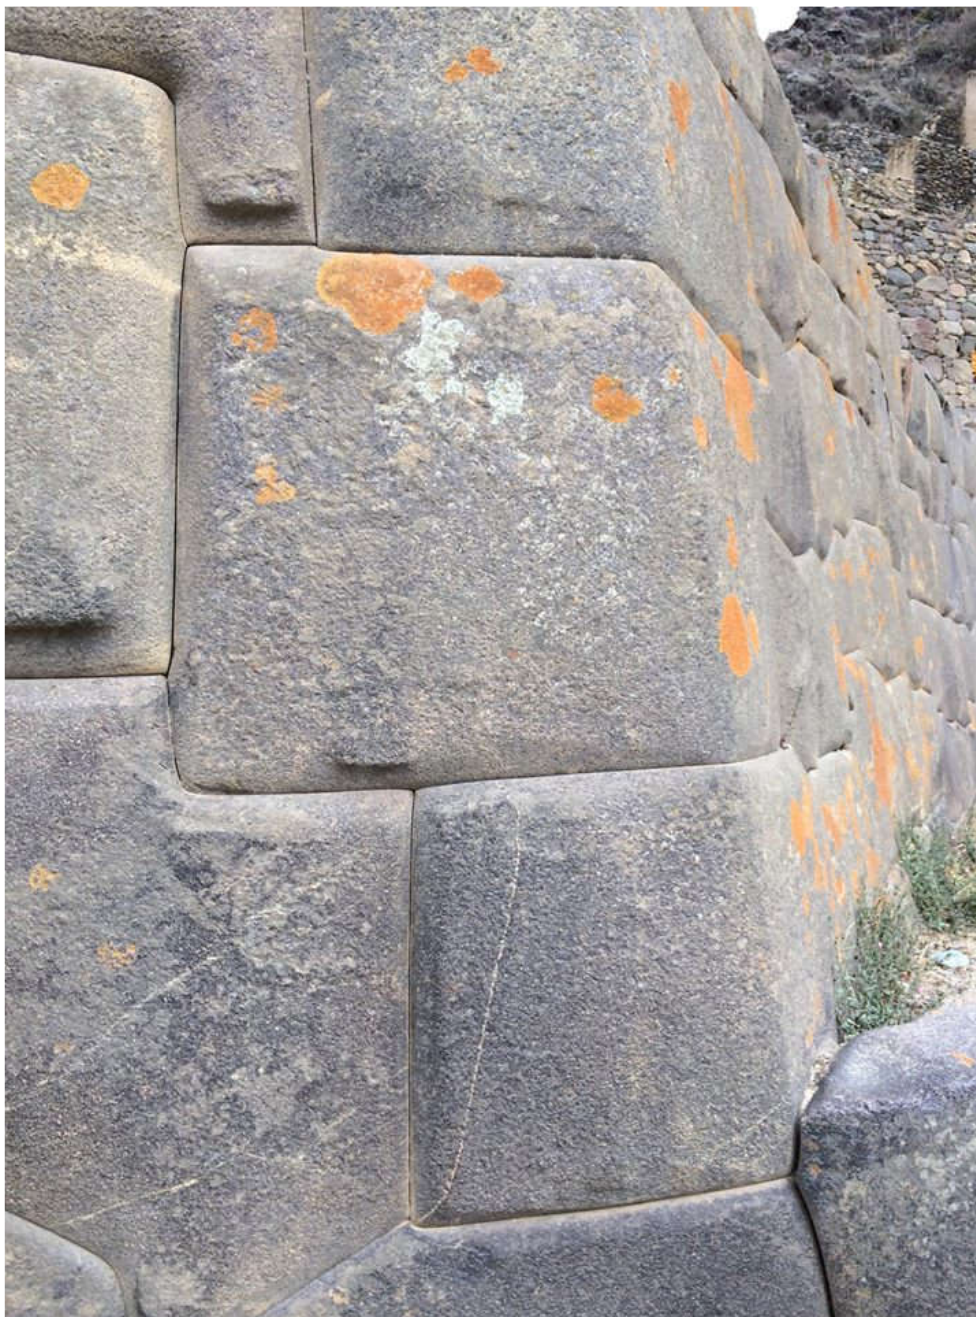

Фото. 7. Ольянтайтамбо (В. Everett, [www.facebook.com/barry.everett.3](http://www.facebook.com/barry.everett.3)).

лику-блин к тяжёлому ответному каменному блоку, постепенно удаляли в нужных местах лишний материал до полного прилегания реплики к блоку.

Если требовалась бóльшая точность передачи рельефа, чем та, что обеспечивается репликой-блином, то изготавливалась реплика реплики. Вначале, приложив брусок сырой глины к выбранному участку каменного блока, делали отпечаток его поверхности. После затвердевания полученной репликой делали ещё один отпечаток в сырой глине. После сушки реплику реплики использовали далее в качестве копии участка поверхности каменного блока при изготовлении ответной части каменной кладки.

В другом способе по периметру выбранного участка каменного блока устанавливали бортик из глины, после чего образовавшуюся емкость заполняли гипсом. После затвердевания полученной репликой делали отпечаток в сырой глине или, установив бортик, заполняли образовавшуюся емкость гипсом (поверхность гипсовой формы предварительно покрывалась составом, препятствующим схватыванию заливаемого гипса с гипсовой фор-

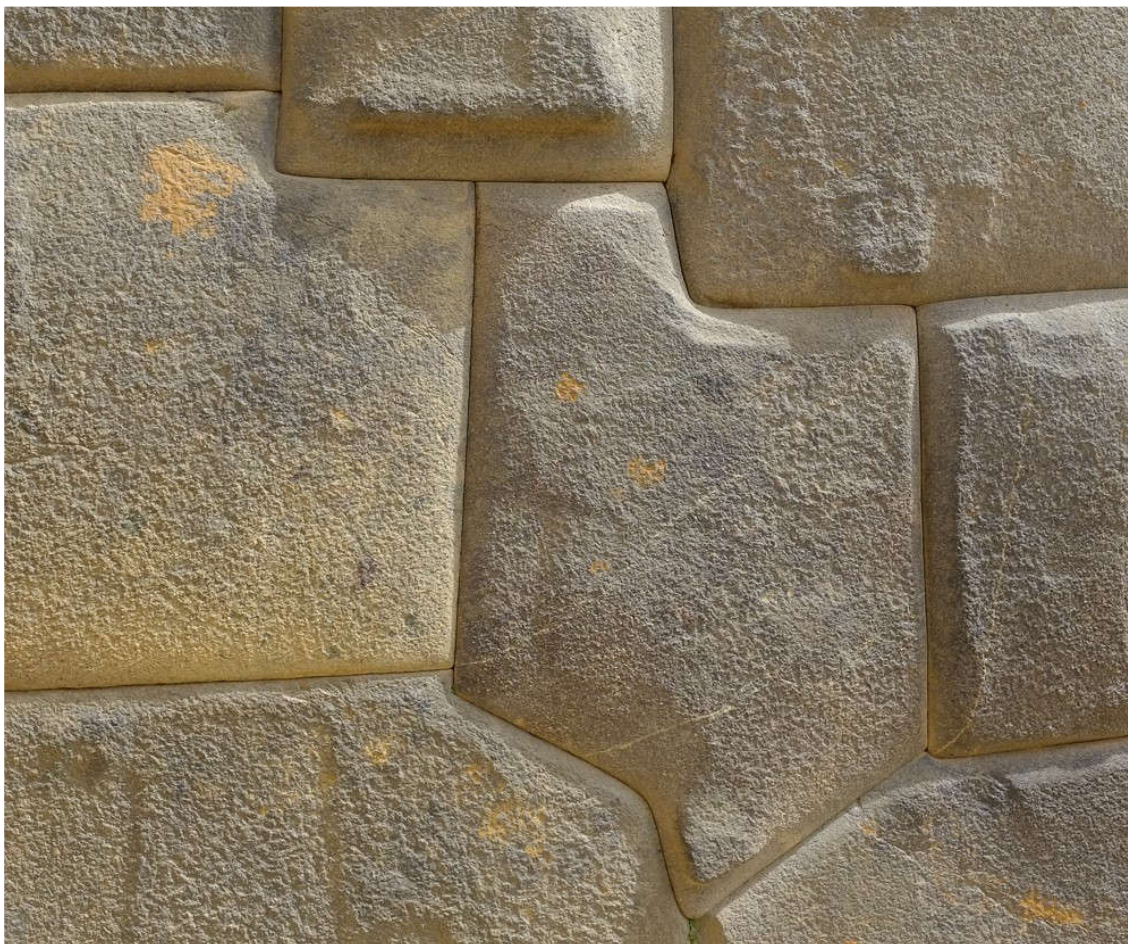

Фото. 8. Ольянтайтамбо (С. Boudou, 2013).

мой). После сушки полученную реплику реплики использовали далее в качестве копии участка поверхности каменного блока при изготовлении ответной части каменной кладки.

Реплики также использовались в местах примыкания каменных построек из крупных блоков к скалам. Реплика снималась с предварительно подготовленного участка скалы и затем прикладывалась к обрабатываемому каменному блоку, или наоборот реплика снималась с обработанного каменного блока и затем прикладывалась к обрабатываемой скале. Всё зависело от того, что было удобнее в каждом конкретном случае. Поскольку очень большие каменные блоки подобны скалам – их чрезвычайно трудно двигать, то реплики также использовались при стыковке больших блоков к очень большим блокам и очень больших блоков к другим очень большим блокам.

Чем больше размеры каменного блока, тем больше и тяжелее изготавливаемые по нему реплики. Поэтому, начиная с определённого размера каменного блока, реплики приходится снимать с участков каменного блока. Чтобы обеспечить правильное взаимное положение реплик на обрабатываемой ответной поверхности блока/скалы, участки соседних реплик должны частично перекрываться. Недостатком реплик является более высокая, чем у пантографа, погрешность сопряжения поверхностей смежных блоков и более высокая по сравнению с уменьшенной моделью блока трудоёмкость изготовления.

Преимущество реплики состоит в том, что по образцу (реплике) обрабатывается только одна из сопрягаемых поверхностей смежных блоков, исходная поверхность обрабатывается произвольно (независимо). В отличие от реплики в методе с пантографом необходимо по образцу (модели) обрабатывать обе сопрягаемые поверхности, произвольно обрабатываемых поверхностей нет.

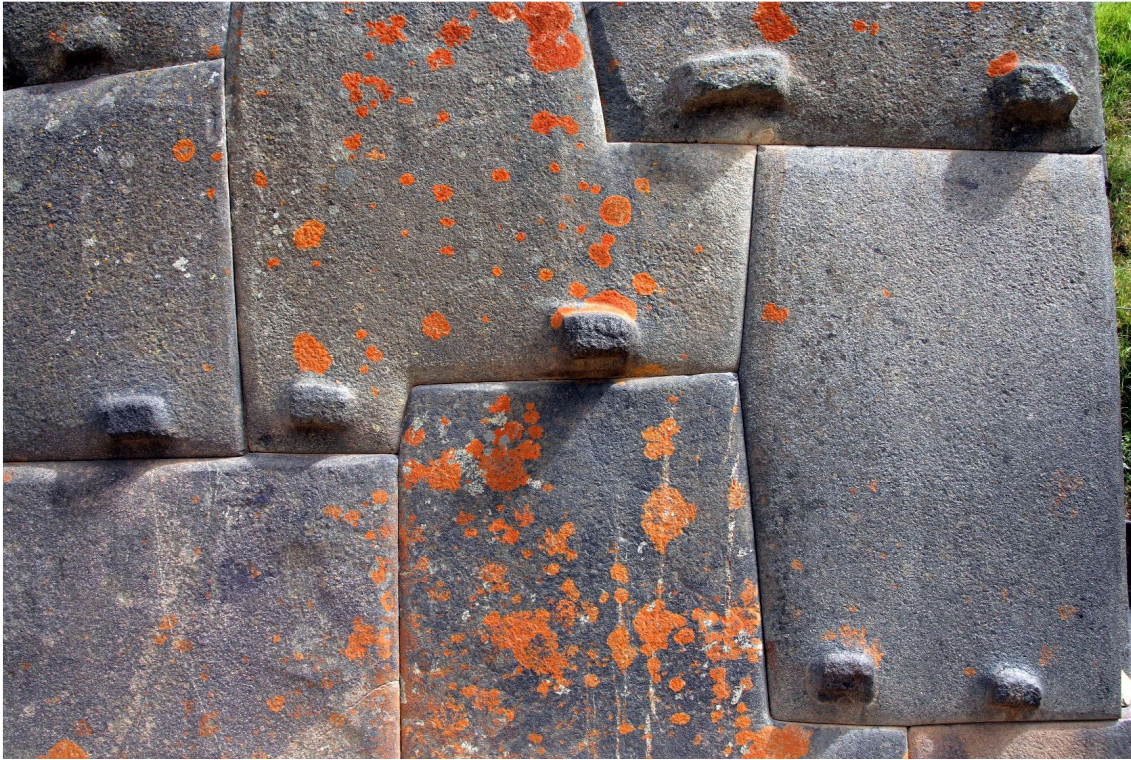

Фото. 9. Ольянтайтамбо (В. Foerster, 2009, hiddenincatours.com).

### **2.3. Основная проблема**

Что вынужден постоянно делать каменщик при изготовлении блоков, стыкующихся друг с другом по сложному профилю? Каменщик вынужден постоянно прикладывать один камень к другому, чтобы определять места, где следует удалить лишний материал. Когда камни небольшие, сделать это не сложно. Но, как это сделать, когда вес камней составляет сотни килограмм и тонны? Предложенные способы как раз и позволяют решить данную проблему – многократно перемещать тяжёлый ответный блок более не требуется.

### **2.4. Зачем ещё была нужна глиняная модель объекта?**

Всегда крайне полезно:

- иметь небольшую модель объекта, состоящего из множества деталей сложной формы, соединяемых друг с другом сложным образом;
- покрутить каждый блок в руках;
- точнее оценить пропорции;
- править блоки, если что-то не понравилось в их форме или сопряжении;
- собирать/разбирать модельную стену, чтобы проверить принципиальную возможность сборки объекта, содержащего замковые элементы;
- собирать/разбирать модельную стену, чтобы проанализировать операций по перемещению, монтажу и установке тяжёлых каменных блоков;
- видеть заранее, как будет выглядеть объект после окончания строительства.

Ведь у архитекторов и строителей в те времена не было компьютеров, чтобы поворачивать деталь в пространстве на экране монитора или, создав виртуальную реальность, побродить по задуманному объекту задолго до его постройки. Даже в наше время изготовление макетов в архитектуре и планировании не потеряло своей актуальности.

Как известно, регион, где использовалась полигональная кладка, является сейсмоопасным.<sup>2,3,4,5</sup> Поэтому, создав модель постройки с замковыми блоками и встряхнув её, можно было увидеть, как поведёт себя объект при землетрясении, после чего при необходимости внести в проект соответствующие исправления. Других способов тогда просто не существовало, расчёты были грубыми, а интуиция и опыт могли подвести.

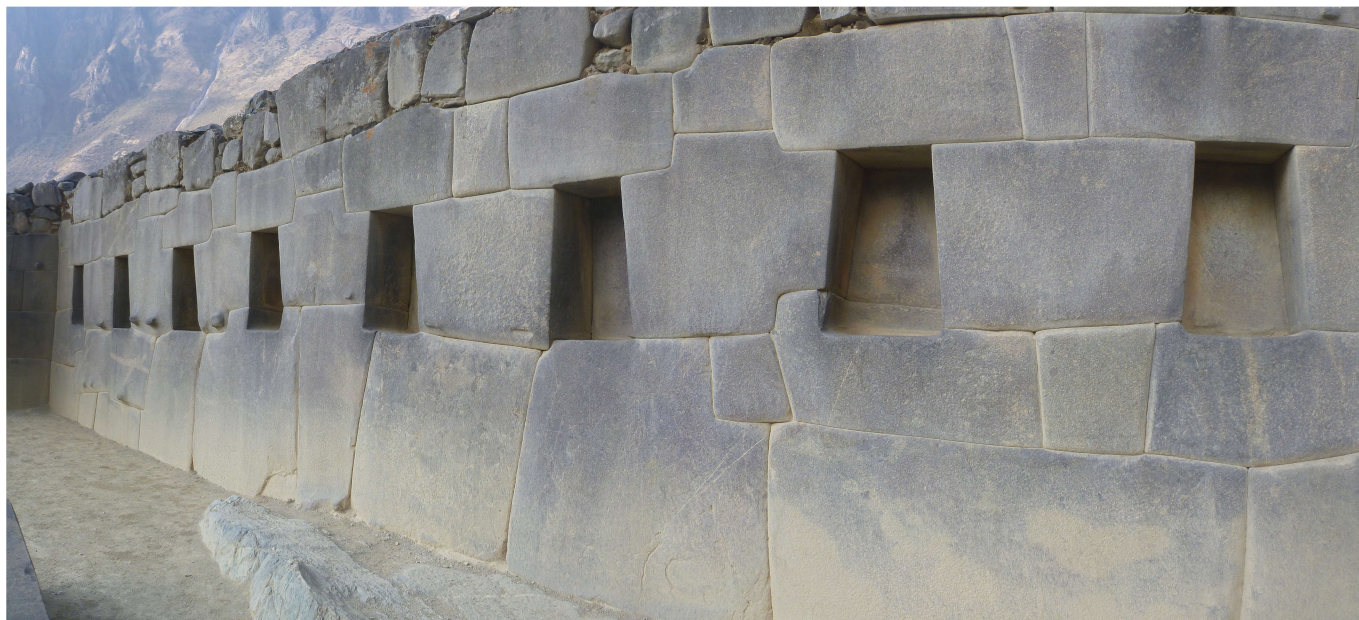

Фото. 10. Храм десяти ниш, Ольянтайтамбо (Р. Adams, 2012, [manboyinthepromisedlanddot-com.wordpress.com](http://manboyinthepromisedlanddot-com.wordpress.com)).

Как было показано выше, и бетонные отливки, и глиняные модели имеют усадку. Следовательно, в обоих случаях между блоками полигональной кладки должны возникать связанные с усадкой зазоры. Тогда в чём же состоит преимущество глиняной модели? Дело в том, что при возникновении вызываемых усадкой зазоров в глиняной модели стены, зазоры эти всегда можно устранить, наложив тонкий слой глины на глиняные модельные блоки там, где это требуется. При этом какие-либо требования к прочности и долговечности добавленных слоёв глины просто неприменимы, так как глиняная модель – это всего лишь вспомогательный элемент строительного процесса не испытывающий больших нагрузок, который выбрасывается после непродолжительного использования.

А вот покрывать тонким в несколько миллиметров слоем бетона отливку из бетона бесполезно, поскольку прочность сцепления этого слоя с отливкой будет невелика, и он очень скоро отвалится/разрушится под действием весовой нагрузки и/или погодных условий. На бетонную отливку можно наложить слой потолще, охватывающий всю поверхность отливки, а не отдельный участок (см. раздел 2.1.1). Такой слой будет держаться лучше, однако технология создания подобного слоя в строительстве является слишком сложной и дорогой.

Таким образом, признаками недавней постройки и/или неудачной реставрации (крепость Саксайуаман, комплекс в Тараваси) являются: трещины в блоках, следы нанесения бетонного раствора, слоистая структура разрушенных блоков (образуется из-за послойного наращивания тела “камня” с целью устранения вызванных усадкой зазоров), большие зазоры между блоками и непараллельность этих зазоров, расползание блоков полигональной кладки.

На верхних гранях у ряда разобранных каменных блоков в Ольянтайтамбо обращают на себя внимание характерные L- и U-образные выемки под основания блоков, устанавливаемых сверху.<sup>8,9</sup> Некоторые из этих выемок охватывают два и даже три соседних блока, обеспечивая тем самым перевязку блоков. Данные выемки в соответствии с принципами устойчивого равновесия гарантируют возвращение блоков в исходное положение в случае их небольшого горизонтального смещения (вдоль стены) во время землетрясения. Рассматриваемые выемки в верхних гранях блоков и соответствующие им выступающие части в нижних гранях устанавливаемых сверху блоков закладываются на этапе лепки глиняной модели.

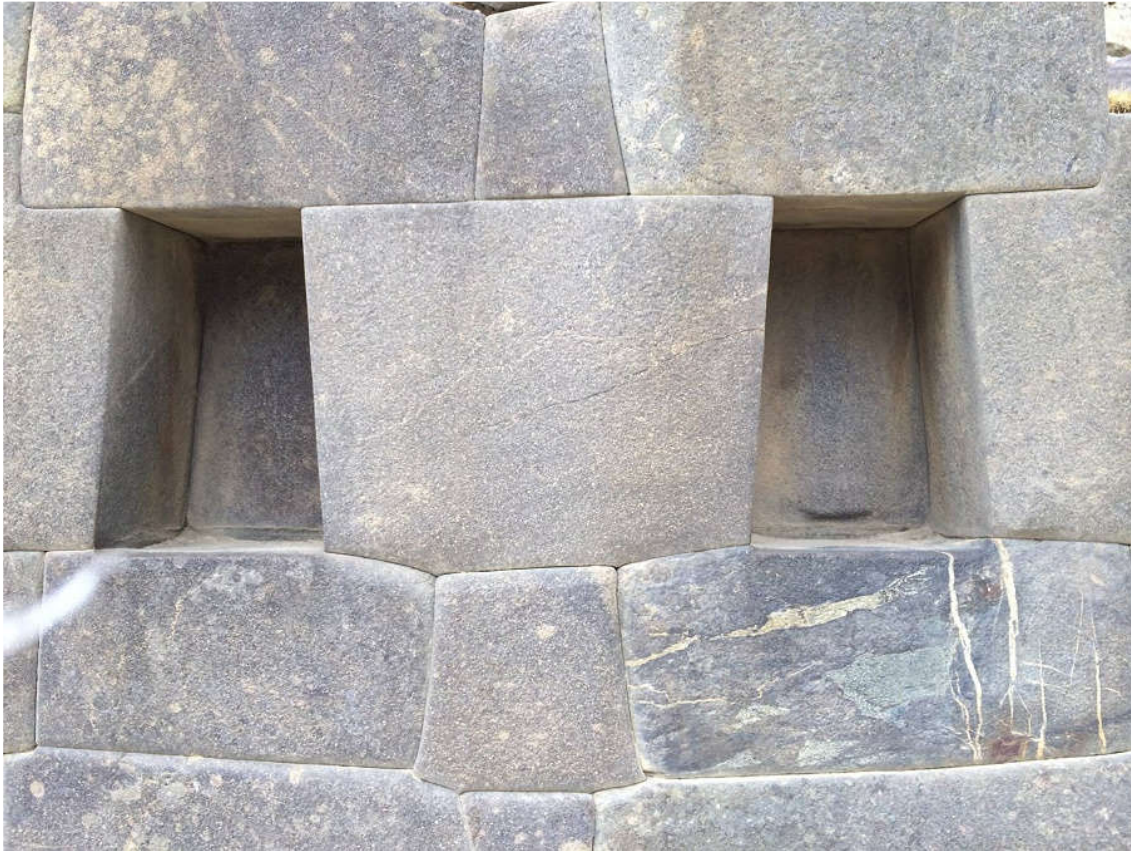

Фото. 11. Храм десяти ниш, Ольянтайтамбо (А. Fuchs, 2008, sy-akka.de/wordpress).

Так как глиняная модель стены строится снизу вверх и сушится ряд за рядом, то, по идее, неглубокие вдавленности должны возникать естественным образом в основании модельных блоков, которые, будучи более мягкими (сырыми), давят своим весом на более твёрдые (сухие) блоки, расположенные под ними. Имеющиеся к настоящему моменту материалы не позволяют с уверенностью подтвердить или опровергнуть наличие такого рода вдавленностей.

### ***2.5. Каковы преимущества пантографа в сравнении с репликой?***

Когда мы прикладываем реплику к обрабатываемой протяжённой поверхности со сложным рельефом, мы не видим чётко, в каких местах и сколько материала следует удалить. Поэтому при работе с репликой приходится чем-то эту реплику окрашивать, скажем, мелком или угольком, и, приложив к обрабатываемому участку поверхности, слегка елозить, чтобы отметить места выборки материала. Вспомните, что делает стоматолог после пломбировки зуба. Он кладёт на пломбу кусочек копировальной (карбоновой) бумаги и просит, закрыв рот, чуть-чуть пожевать её зубами. После чего убирает немного материала пломбы в окрашенном месте. И так повторяет несколько раз, пока зубы при смыкании не займут привычного положения.

При работе с пантографом к глиняной модели прикладывается острый щуп (Pointer A), а к обрабатываемой поверхности заготовки подводится указатель (Pointer B), механически связанный со щупом посредством параллелограммного механизма. В отличие от реплики из-за малой площади щупа и указателя измерение рельефа фактически осуществляется в точке поверхности, причём, хорошо видно в какой именно, вся поверхность полностью открыта.

Более того, пантограф позволяет чётко определить толщину удаляемого материала в любой точке, на которую направлен указатель. Следовательно, убирать лишний материал можно за существенно меньшее число попыток. Всё это ведёт к резкому росту производительности. Наибольшая производительность достигается при работе на пантографе

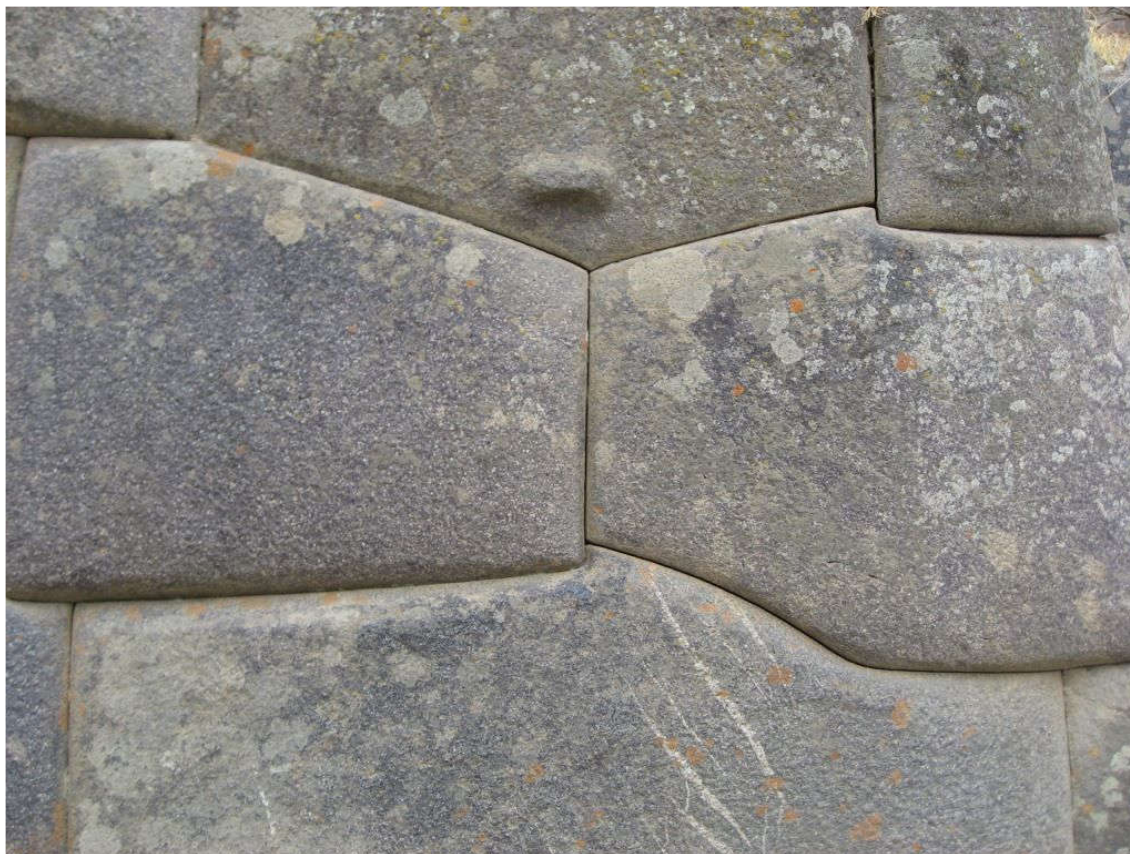

Фото. 12. Ольянтайтамбо (В. Everett, [www.facebook.com/barry.everett.3](http://www.facebook.com/barry.everett.3)).

двух человек. Один указателем пантографа показывает место (точку) на каменной заготовке и называет толщину удаляемого в этом месте материала, а другой с помощью молотка и зубила убирает указанное количество материала.

Другим преимуществом пантографа в сравнении с репликой является то, что касаться практически невесомым щупом (устройство сбалансировано противовесом) глиняной модели блока значительно быстрее и легче, чем прикладывать сравнительно тяжёлую реплику к каменной заготовке, и затем этой репликой ещё немножко елозить.

Также пантограф позволяет легко выдерживать задаваемые архитектором пропорции, что при применении реплик придётся делать на глазок, долго подбирая заготовки подходящих размеров. Представьте, что вам требуется точно вписать постройку в какой-то неизменяемый или трудно изменяемый габарит, скажем, между двумя скальными выходами или в пещеру. Для этого достаточно измерить расстояние между скальными выходами, размер модели, разделить первое на второе и полученный коэффициент увеличения задать в пантографе.

Что ещё даёт использование глиняных модельных блоков и пантографа? Пусть требуется внешнюю сторону стены изготовить с наклоном. Для этого достаточно положить сырую глиняную модель стены на тыльную сторону, установить упоры, задающие необходимый наклон, сверху на лицевую сторону положить плоскую поверхность, на которой разместить подходящего веса грузы. Вместо грузов можно использовать стягивающие струбицы. Через некоторое время глиняная модель стены деформируется должным образом. Заданный угол в таком способе можно выдерживать очень точно на всём протяжении стены.

### **2.6. Обратный подход: создание глиняной модели по каменной заготовке, изготовление поверхности сопряжения и её перенос на каменную заготовку**

Выше описывался способ, при котором вначале по эскизу создавалась модель, а затем под каждый блок модели подбиралась каменная заготовка. Такой способ позволяет по-

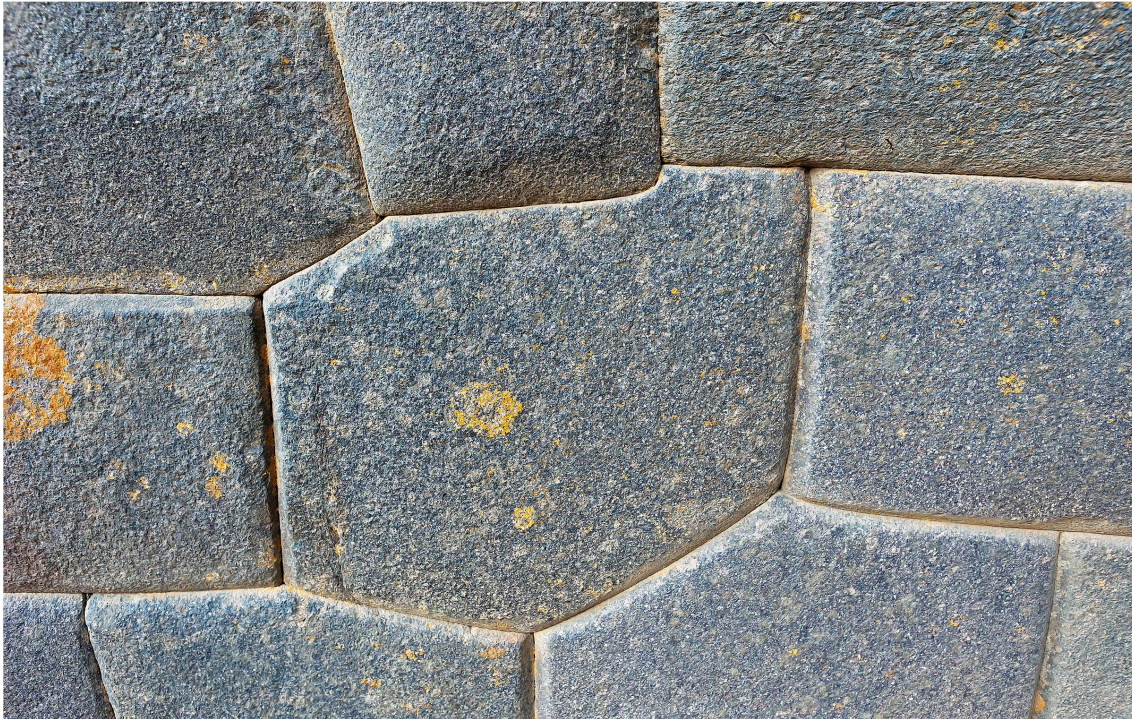

Фото. 13. Ольянтайтамбо (И. Отькало, 2015, peru-info.me).

вторять много раз участок стены (при необходимости в разном масштабе), используя каждый раз одну и ту же глиняную модель (см. возможный пример подобной кладки в 22). Недостатком способа является большой объём скальваемого материала каменной заготовки. Анализ показывает, что в основном для полигональной кладки использовали обратный способ.

В обратном способе сначала по имеющейся каменной заготовке произвольной формы с помощью пантографа создаётся её уменьшенная глиняная модель. Для этого кусок сырой глины насаживается на заострённый, скажем, трёх/четырёхгранный металлический штырь, расположенный в центре предназначенной для модели поворотной платформы (Table A на Рис. 2). Благодаря такому штырю модель в любой момент можно снимать с пантографа и точно возвращать на прежнее место.

В тех местах модели, где глины не хватает, она добавляется. Удаление излишков глины выполняется непосредственно металлическим указателем пантографа (Pointer A на Рис. 2; вместо острия на указателе можно закрепить подходящий инструмент, например, проволочную петлю, резец, скребок и т. п.), шуп которого (Pointer B) движется по поверхности каменного блока вертикально то вверх, затем небольшой поворот платформы с заготовкой (Table B) вокруг вертикальной оси, то вниз, снова небольшой поворот, снова вверх и т. д.<sup>20</sup> Благодаря пантографу создание основы глиняной модели не занимает много времени.

На следующем этапе из полученных глиняных модельных блоков складывают прототип стены. Блоки пока не имеют специально изготовленных посадочных поверхностей. Исходя из размеров и формы блоков, каждому блоку в прототипе стены определяется его местоположение. Архитектор-строитель приблизительно размечает на глиняной модели стены контуры будущих сопряжений, которые должны: отражать задуманный стиль, обеспечивать устойчивость создаваемой полигональной кладки, минимизировать затраты труда на обработку посадочных поверхностей. Далее согласно выполненной разметки глина выбирается в тех местах модельных блоков, которыми они будут примыкать друг к другу.

Теперь из полученных модельных блоков собирается модель стены. Небольшими правками блоки точнее досопрягаются друг с другом. Если в ходе манипуляций модель блока

случайно попортили, то форму модели в любом её месте всегда можно восстановить, поместив модель блока обратно в пантограф (на указанный выше штырь) и сравнив с формой исходной каменной заготовки. Далее стена сушится. В начале сушится нижний ряд, затем следующий за ним и т. д. В процессе сушки-усадки модельные блоки досопрягаются более точно под собственным весом и с небольшими правками строителя. Если в результате усадки между модельными блоками возникает зазор, то этот зазор устраняется нанесением на модельные блоки в месте их стыковки слоёв глины соответствующих толщин.

На последнем этапе модельную стену разбирают. Глиняную модель блока устанавливают обратно в пантограф (на указанный выше штырь) и с помощью молотка и зубила переносят посадочные места на соответствующую этому модельному блоку каменную заготовку.

В описанном способе каменный блок устанавливается в пантограф, по меньшей мере, дважды. Для того чтобы можно было точно вернуть каменный блок на прежнее место, на платформу (Table B) следует нанести, например, две линии, радиально расходящиеся из её центра. При первой установке каменного блока в местах, где такие линии выходят из-под блока, на поверхности камня краской наносятся риски совмещения.

### **2.7. Ещё несколько преимуществ пантографа**

Использование уменьшенной глиняной модели и пантографа позволяет изготавливать блоки прямо в карьере, где происходит добыча камня.<sup>8,9</sup> В результате из карьера на стройплощадку везут уже готовые каменные блоки. Данный подход заметно сокращает вес транспортируемых блоков и уменьшает объём перевозок в целом. Кроме того, при такой организации на стройплощадке не возникает большого количества строительного мусора, который тоже потом нужно куда-то транспортировать с места строительства.

И в способе с пантографом, и в способе с репликами используются вспомогательные элементы. В способе с пантографом это глиняные модельные блоки, в способе с репликами – это сами реплики. Для стыковки каменных блоков в способе с репликами боковая поверхность блока должна быть разбита на несколько перекрывающихся участков, для каждого из которых требуется своя реплика. Если теперь мысленно приставить к боковой поверхности некраевого каменного блока все сделанные для него и по нему реплики, то получится некое подобие колеса, т. е. достаточно массивное образование. Если используется реплика реплики, то таких “колёс” будет уже два. Таким образом, в методе реплика реплики для каждого некраевого блока потребуется изготовить по одному “колесу” из реплик. Давайте теперь сравним такое “колесо” из реплик с небольшими модельными блоками в методе, базирующемся на пантографе. Преимущества пантографа очевидны.

### **2.8. Способ, сочетающий элементы способов реплики, глиняной модели и 3D-пантографа**

Вначале на месте будущей постройки устанавливается каждый второй каменный блок первого ряда (см. Рис. 3). Пустые места между этими блоками займут каменные блоки, которые на следующем этапе будут подгоняться с использованием глиняной модели и пантографа под эти первоначально установленные блоки. Высоты каменных блоков, устанавливаемых между первоначальными блоками, должны приблизительно в 2 раза превосходить высоты первоначальных блоков. Поверхности оснований первоначально установленных каменных блоков предварительно обрабатываются должным образом для придания им устойчивости.

Помимо подготовленного основания первоначально установленные блоки также имеют окончательно обработанные боковые грани. Обработка боковых граней представляет собой спрямление с помощью молотка и зубила сложной исходной формы каменной заготовки близкими к плоскостям поверхностями. Наклоны боковых граней первоначально установленных блоков к основаниям этих блоков по возможности не должны превосходить

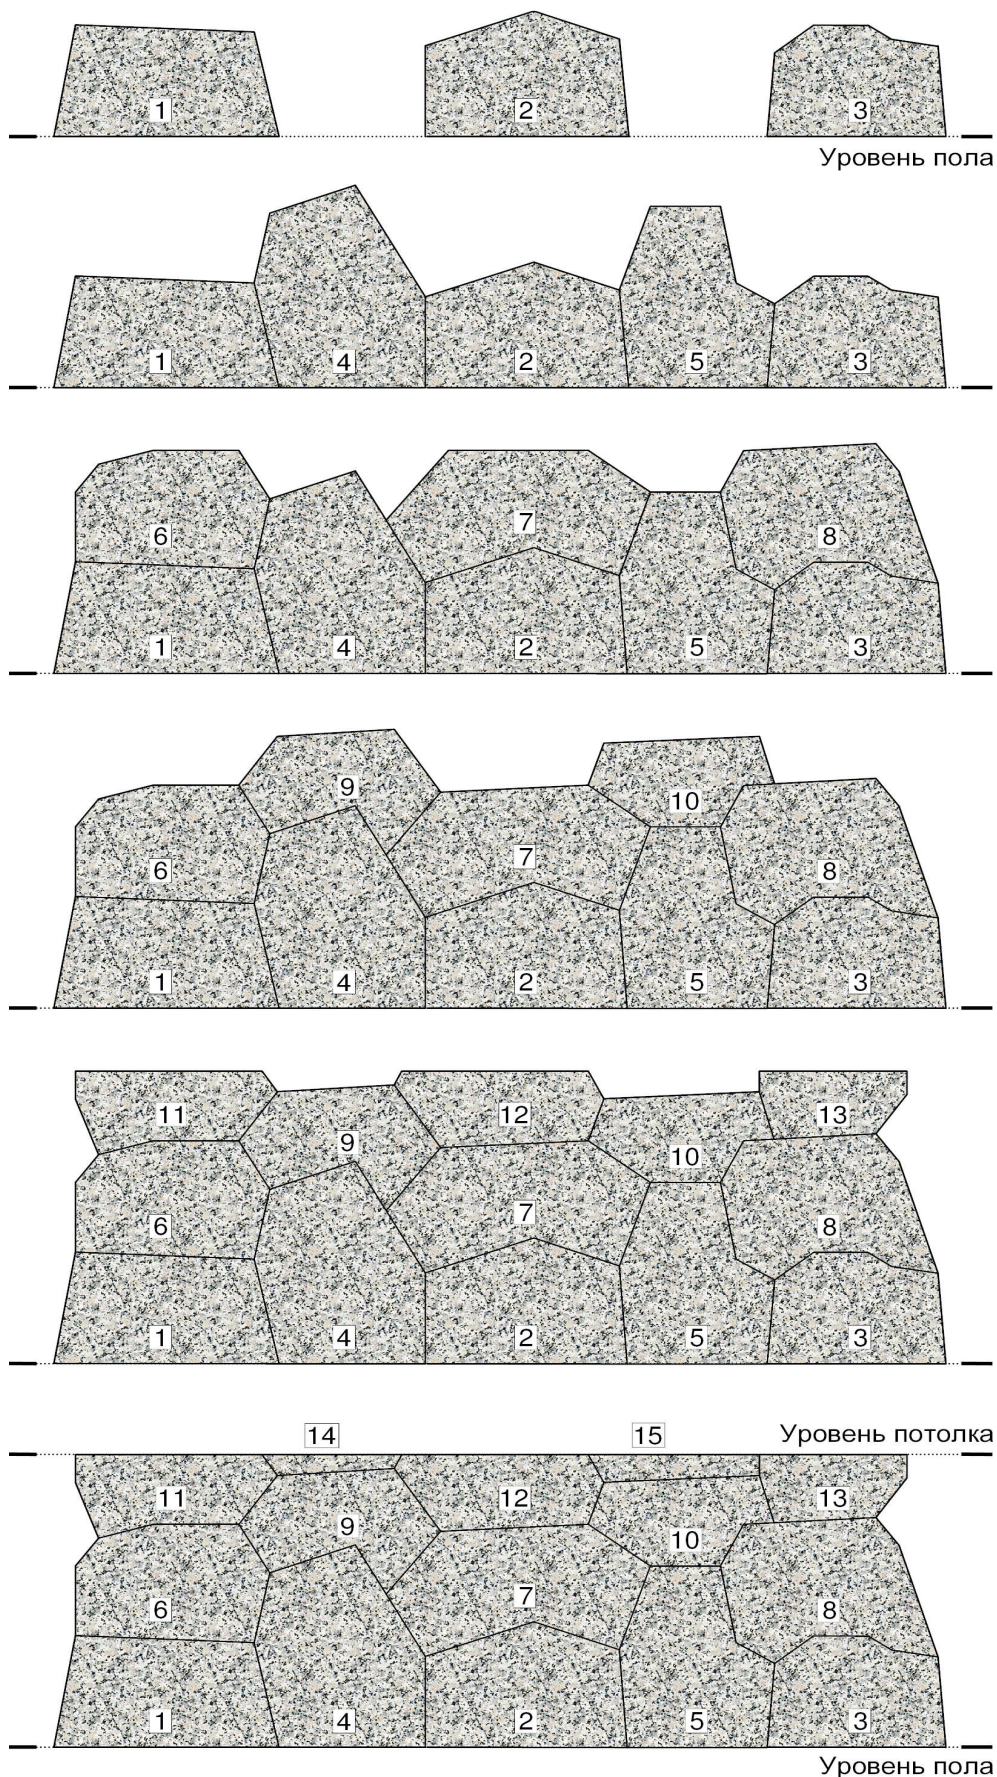

Рис. 3. Способ укладки полигональных блоков, сочетающий элементы способов реплики, глиняной модели и 3D-пантографа. Цифрами показан порядок установки блоков.

90°, чтобы облегчить последующую установку примыкающих блоков. Аналогичное правило распространяется далее для каждого второго блока последующих рядов полигональной кладки.

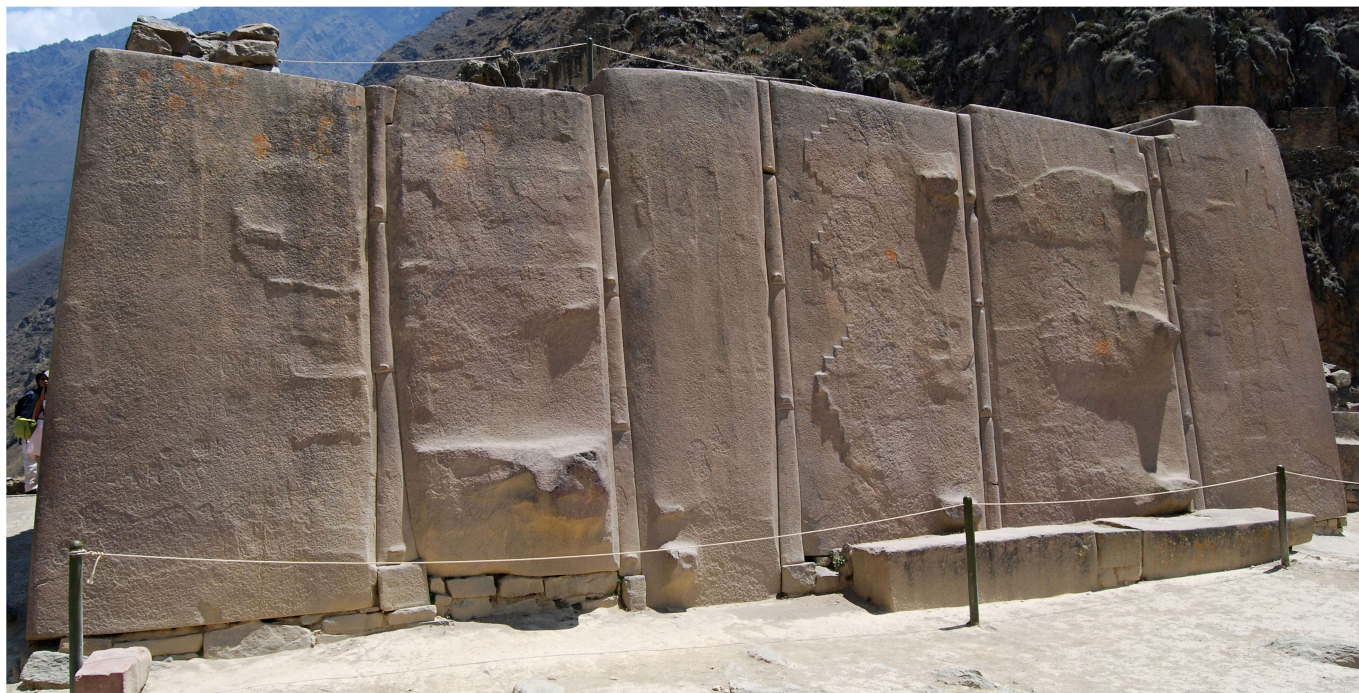

Фото. 14. Стена шести монолитов, Ольянтайтамбо (P. Špindler, 2008, commons.wikimedia.org).

Теперь пространство между первоначально установленными блоками заполняется глиной. Фактически в промежутках между первоначальными блоками создаются глиняные модели блоков в масштабе 1:1. Боковые поверхности этих моделей, контактирующие слева и справа с боковыми поверхностями первоначальных блоков, по сути, являются их репликами. Для облегчения полноразмерных глиняных моделей и уменьшения усадочных деформаций во время сушки модели выполняются пустотелыми. Если в результате усадки между первоначальным каменным блоком и глиняной моделью возникает зазор, то он устраняется нанесением на глиняную модель слоя глины соответствующей толщины.

После сушки глиняная модель блока извлекается из постройки и устанавливается в пантограф на место модели (Table A). На место копии (Table B) устанавливается соответствующая каменная заготовка. Пантограф настраивается на масштаб 1:1 (размещение модели и копии в пантографе при таком масштабе определяется только удобством работы). В случае необходимости с помощью пантографа можно быстро проверить насколько хорошо по размерам подходит выбранная каменная заготовка к данной модели.

Далее поверхности сопряжения с помощью пантографа, молотка и зубила переносят с полноразмерной глиняной модели на каменную заготовку так, как описывалось выше. После переноса поверхностей сопряжения на оставшейся боковой поверхности каменной заготовки формируют остальные (произвольные) грани этого блока. Обработка этих граней представляет собой спрямление сложной исходной формы каменной заготовки близкими к плоскостям поверхностями. В дальнейшем эти грани больше обрабатываться не будут. Полученный таким путём каменный блок окончательно устанавливают на своё место полигональной кладки.

Закончив первый ряд, аналогичным образом изготавливают следующий. В описанном способе, как и в ранее предложенных, используются каменные блоки произвольной формы. Способ обеспечивает хорошую вертикальную перевязку блоков. Поскольку в данном способе нет полноценной глиняной модели постройки, то, чтобы хорошо скомпоновать исходные каменные блоки и тем самым минимизировать количество скальваемого материала при обработке, каменные блоки желательно предварительно выложить на земле тыльной стороной вниз один подле другого.

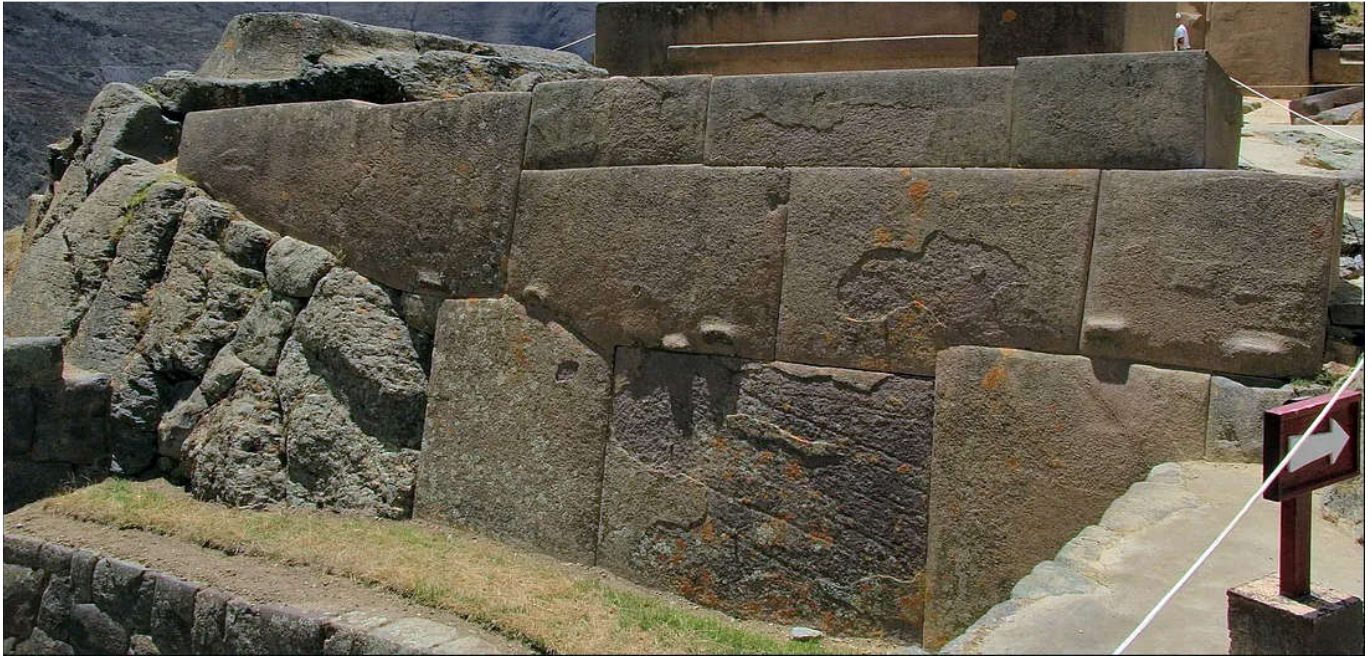

Фото. 15. Ольянтайтамбо (Е. Берзин, 2019, [allenatore.livejournal.com/15230.html](https://allenatore.livejournal.com/15230.html)).

К недостатку способа следует отнести высокую трудоёмкость, связанную с изготовлением глиняной модели блока в масштабе 1:1. Тем не менее, в сравнении со способом реплики реплики, данный способ в состоянии обеспечить заметно более высокую точность сопряжения контактирующих поверхностей, когда таковая необходима. Как и в случаях с репликами, примерно половина боковой поверхности каменных блоков в данном способе обрабатывается произвольно.

Состоящая условно из одного ряда “Стена шести монолитов” в Ольянтайтамбо (см. Фото. 14), вероятнее всего, была изготовлена согласно описанному способу. Следует обратить внимание на небольшие камни, на которых покоятся монолиты. Камни эти обеспечивают выборку боковых зазоров между монолитами и самыми нижними узкими вертикальными вставками (см. раздел 2.1). По всей видимости, на заключительном этапе строительства небольшие камни в основании монолитов должны были скрываться уровнем пола.

Оставив пока в стороне архитектурный вид памятника, зададимся вопросом: Почему монолиты не сомкнуты друг с другом непосредственно, а требуют промежуточных вставок? Дело в том, что использование реплик на столь протяжённых участках контакта боковых поверхностей монолитов не в состоянии обеспечить получение нулевого зазора. Поэтому для соединения монолитов понадобились промежуточные вставки.

Чтобы подчеркнуть гигантские размеры монолитов, вставки должны существенно отличаться от монолитов по ширине. Так как изготовление и установка единой узкой, высотой с монолит вставки технологически ещё более сложная задача, чем непосредственное сопряжение соседних монолитов, то промежуточные вставки были разбиты на 3-5 отдельных частей. Каждая вставка изготавливалась и устанавливалась последовательно друг за другом – вначале ряд (условный) из самых нижних, затем следующий ряд вставок, и т. д.

### **2.9. “Планетарный” пантограф для использования в строительстве**

Современные пантографы, используемые скульпторами, имеют две синхронно поворачивающиеся платформы. На одной платформе (см. Table A на Рис. 2) установлена модель, на другой (Table B) – её увеличенная копия. Обычно увеличенная копия – пустотелая, от чего вес копии, как правило, невелик. Платформа такого пантографа при применении его в строительстве способна выдержать каменные заготовки весом до 700 кг. Когда скульптура имеет большие размеры и большой вес, её модель можно разделить на несколько

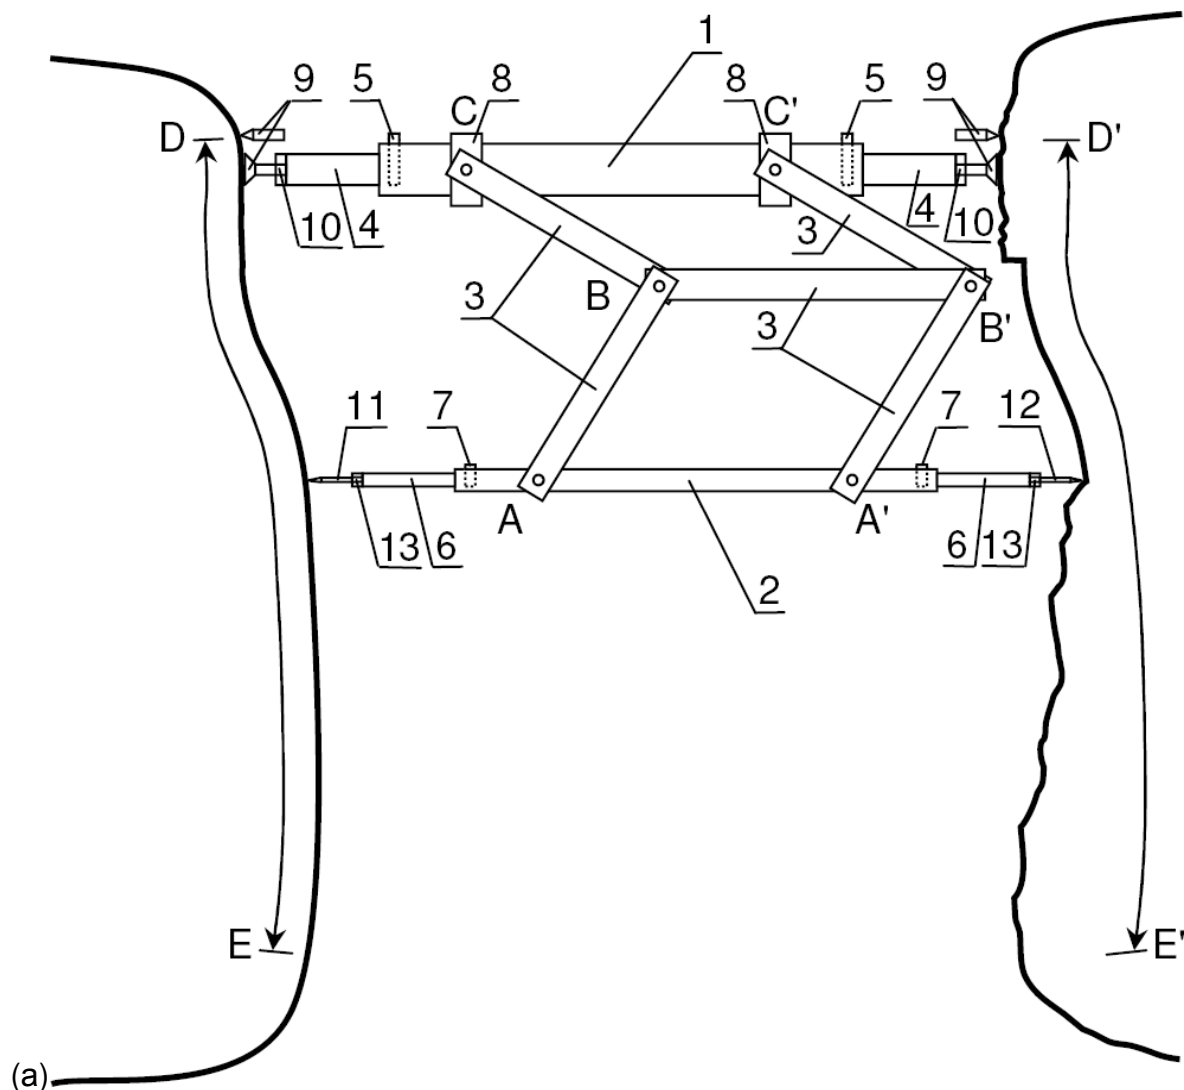

Рис. 4. Транслятор рельефа: 1 – несущий стержень; 2 – измерительный стержень; 3 – двойной параллелограммный механизм ( $AB=A'B'=BC=B'C'$ ,  $AA'=BB'=CC'$ ); 4 – выдвижные секции для грубой установки длины несущего стержня; 5 – штифты, фиксирующие положения выдвижных секций несущего стержня; 6 – выдвижные секции для грубой установки длины измерительного стержня; 7 – штифты, фиксирующие положения выдвижных секций измерительного стержня; 8 – цилиндрические шарниры, обеспечивающие свободное вращение измерительного стержня вместе с двойным параллелограммным механизмом вокруг несущего стержня; 9 – опоры (с заострением или с плоской подошвой) несущего стержня, вывинчивая которые несущий стержень крепится в распор между двумя сопрягаемыми каменными блоками; 10 – контргайки, фиксирующие положения опор несущего стержня; 11 – щуп измерительного стержня; 12 – указатель измерительного стержня; 13 – контргайки, фиксирующие положение щупа и указателя измерительного стержня; 14 – цилиндрические шарниры, обеспечивающие свободное вращение измерительного стержня вокруг своей оси; DE – произвольно-обработанный участок боковой поверхности предыдущего каменного блока; D'E' – обрабатываемый с помощью транслятора участок боковой поверхности текущего каменного блока. Установка несущего стержня в распор между блоками (а) перпендикулярно сопрягаемым поверхностям на опоры с плоской подошвой, (б) под углом к сопрягаемым поверхностям на опоры с заострениями. (б) Транслятор с дополнительными шарнирами, изогнутыми щупом и указателем для работы с U-образными выемками.

частей. Для каждой такой части можно изготовить её увеличенную копию, после чего из полученных увеличенных копий собрать одну большую скульптуру. Но это не наш случай.

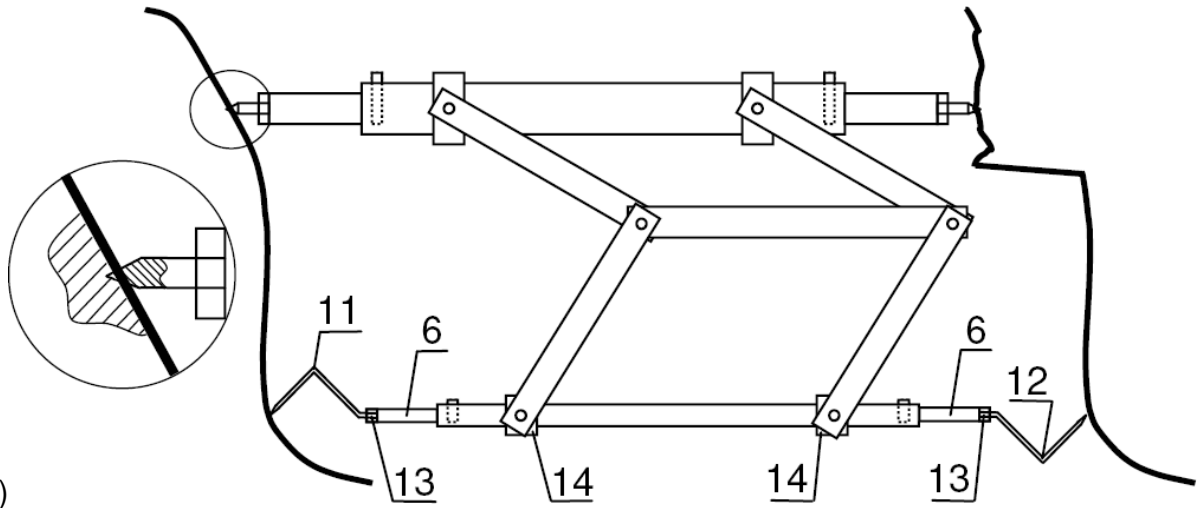

Рис. 4. Продолжение.

Современный пантограф для работы с большими и тяжёлыми заготовками не подходит. Вместо существующей конструкции можно предложить следующий “планетарный” пантограф. Тяжёлая заготовка в таком пантографе устанавливается просто на ровную площадку, а рама, к которой крепятся стрела пантографа и платформа с моделью, поворачивается в процессе работы в горизонтальной плоскости вокруг неподвижно стоящей заготовки. По мере поворота рамы модель также поворачивается вокруг своей вертикальной оси на необходимый угол (фактически сохраняет исходную ориентацию в пространстве) с помощью соответствующего механизма. Одному обороту точки опоры (Pivot на Рис. 2) стрелы пантографа вокруг заготовки соответствует один оборот модели вокруг своей оси.

В отличие от существующего пантографа планетарный пантограф занимает больше места, а использующий пантограф человек вынужден перемещаться по мере работы вместе с поворачивающейся рамой вокруг заготовки. Эти особенности можно отнести к недостаткам планетарного пантографа, которые, впрочем, вовсе не критичны в строительном деле.

### **2.10. Транслятор рельефа на основе двойного параллелограммного механизма**

Можно предложить несложное механическое приспособление – транслятор рельефа (см. Рис. 4), с помощью которого в случае сравнительно простой полигональной кладки возможно выполнить вполне качественную стыковку поверхностей смежных каменных блоков “по месту”. Для обработки данным приспособлением оба сопрягаемых каменных блока кладутся на землю тыльной стороной. Соответственно, подвергаемая обработке основание, верхняя сторона и боковые поверхности блоков располагаются в данном способе вертикально.

Вначале, обработке (произвольной) подвергается сопрягаемый участок поверхности первого блока. В ходе обработки поверхность на этом участке делается плавно изменяющейся, близкой к плоскости. Такая поверхность получается, когда каменщик вручную “на глазок” изготавливает плоскую поверхность, никак не контролируя отклонение обрабатываемой поверхности от плоскости.

Затем рядом с первым блоком устанавливают второй каменный блок. Второй каменный блок размещают так, чтобы совмещаемые участки поверхности оказались напротив друг друга. Расстояние между блоками задаётся таким (60-80 см), чтобы между блоками мог поместиться каменщик, который без особого стеснения был бы в состоянии работать молотком и зубилом в пространстве между этими блоками. Далее между блоками враспор устанавливается предлагаемый транслятор рельефа, с помощью которого каменщик переносит на второй блок обращённый рельеф ранее обработанного участка поверхности первого блока.

В целом, боковая поверхность каменного блока представляет собой совокупность указанных условно-плоских участков поверхности. Условно-плоские участки могут примыкать друг к другу, образуя резкую границу, либо они могут переходить друг в друга плавно через L-образные выемки. U-образные выемки сводятся к паре расположенных встречно L-образных выемок. Опишем далее более подробно устройство транслятора и последовательность обработки каменных блоков с его помощью.

### **2.10.1. Конструкция транслятора рельефа**

Транслятор рельефа представляет собой два параллельных стержня, соединённых друг с другом посредством двойного параллелограммного механизма (см. Рис. 4). Двойной параллелограммный механизм относится к шарнирно-рычажным направляющим механизмам, имеет две степени свободы и состоит из семи звеньев ( $AB=A'B'=BC=B'C'$ ,  $AA'=BB'=CC'$ ).<sup>18</sup> В рассматриваемом трансляторе тела стержней являются частью двойного параллелограммного механизма. Стержень с большим поперечным сечением будем называть несущим, стержень с меньшим поперечным сечением будем называть измерительным. Благодаря телескопическому или иному сочленению, длины стержней можно грубо изменять, сдвигая и раздвигая краевые секции вдоль стержня. По окончании грубой регулировки длин стержней относительные положения краевых секций фиксируются с помощью штифтов.

В концы несущего стержня вкручены наконечники-опоры, вывинчивая которые стержень транслятора надёжно закрепляется в распор на обрабатываемом участке между сопрягаемыми каменными блоками. В оба конца измерительного стержня вкручены наконечники-заострения. Заострение, направленное на предварительно обработанную поверхность первого блока, будем называть щупом; а заострение, направленное на обрабатываемую поверхность второго блока, будем называть указателем. Путём закручивания/выкручивания снабжённых резьбой заострений обеспечивается точное задание длины измерительного стержня. Выставленные положение опор и заострений фиксируются контргайками.

Если несущий стержень устанавливается в распор между блоками перпендикулярно сопрягаемым поверхностям, то используются опоры с плоской подошвой (см. Рис. 4а). Если несущий стержень устанавливается в распор с заметным наклоном к сопрягаемым поверхностям, то используются опоры с заострениями (см. Рис. 4б). В последнем случае перед установкой несущего стержня в местах установки опор изготавливаются небольшие выемки в камнях. Выемки необходимы для исключения соскальзывания опор несущего стержня.

Поскольку транслятор должен передавать пространственный рельеф поверхности, а двойной параллелограммный механизм имеет только две степени свободы, то крепление параллелограммного механизма к несущему стержню выполнено через цилиндрические шарниры. Таким образом, благодаря цилиндрическим шарнирам несущего стержня, измерительный стержень вместе с двойным параллелограммным механизмом может свободно вращаться вокруг несущего стержня. Такое вращение обеспечивает возможность "считывания" рельефа измерительным стержнем вокруг места установки несущего стержня.

### **2.10.2. Порядок работы с транслятором рельефа**

Если несущий стержень транслятора устанавливается рядом с тем местом, где расстояние между блоками наибольшее, то наибольшее расстояние задаётся в измерительном стержне по месту, и работа по переносу рельефа начинается с этого места. В целом несущий стержень может быть установлен в любом удобном для каменщика месте. На практике часто бывает удобнее установить несущий стержень ближе к краю блока, и перенос-обращение (трансляцию) рельефа начинать от края блока.

После установки несущего стержня и задания требуемой длины измерительного стержня, кончик щупа измерительного стержня прикладывается к предварительно обработанной поверхности первого каменного блока (показан на рисунке слева). В результате, кончик указателя измерительного стержня покажет место на ответной обрабатываемой поверхности второго блока (показан на рисунке справа), где каменщику следует сколоть материал. Также кончик указателя измерительного стержня покажет толщину скальваемого материала в этом месте. Основная задача двойного параллелограммного механизма состоит в обеспечении строгой параллельности перемещения измерительного стержня. Из приведённого описания видно, что рассматриваемый транслятор на отдельном сопрягаемом участке будет давать такой же результат, что и 3D-пантограф, настроенный на масштаб 1:1.

Точность работы транслятора определяется зазорами в шарнирах и изгибными деформациями конструктивных элементов механизма. Для обеспечения жёсткости конструкции используемые в параллелограммах рейки и шарниры имеют соответствующие размеры сечений и ребра жёсткости (на рисунке не показаны). Для увеличения жёсткости конструкции помимо указанных параллелограммных механизмов могут использоваться дополнительные идентичные параллелограммные механизмы, прикрепляемые как параллельно, так и последовательно (вдоль стержней).

Механизм транслятора имеет ограниченное пространство перемещения, представляющее собой цилиндр с радиусом  $2AB$  (осью цилиндра является несущий стержень). Поэтому при работе с большими блоками невозможно обработать всю сопрягаемую поверхность за одну установку транслятора. Кроме того, из-за конечных размеров реек параллелограммов, шарниров и самих стержней область в непосредственной близости вокруг места установки несущего стержня и в самом этом месте также оказывается необработанной (см. Рис. 4).

Таким образом, после обработки доступной измерительному стержню области сопрягаемой поверхности положение измерительного стержня фиксируется на краю обработанного участка в распор путём небольшого вывинчивания из стержня щупа и/или указателя. После этого, несущий стержень расфиксируется и переносится параллельно зафиксированному в пространстве измерительному стержню в новую позицию, где опять фиксируется в распор. Наконец, измерительный стержень расфиксируется, и работа продолжается на новом участке каменного блока, примыкающем к предыдущему.

Чтобы установкой измерительного стержня в распор не сбивать заданную длину измерительного стержня и не тупить его щуп и указатель, можно до снятия несущего стержня вывести измерительный стержень к краю диапазона перемещения транслятора, и место, которого касается щуп, и место, на которое смотрит указатель, пометить краской. После этого несущий стержень можно расфиксировать, перенести и установить опорами на места, помеченные краской. Заметим, что, располагая рядом таких отметок и используя транслятор уже в качестве прибора контроля, можно точно возвращать каменные блоки на прежнее место для продолжения обработки, если до этого они перемещались по каким-либо причинам. Необходимую фиксацию положения блоков в пространстве обеспечивают установкой клинящих камушков между тыльной стороной блока и землёй.

Описанный выше процесс переноса рельефа показывает, что, если снабдить несущий стержень такими же заострениями, как и у измерительного стержня, а измерительный стержень сделать таким же толстым, как и несущий стержень, а также снабдить измерительный стержень такими же цилиндрическими шарнирами (поз. 14 на Рис. 4б), как и у несущего, то получим вариант исполнения транслятора симметричной конструкции, где нет разницы между несущим и измерительным стержнями. Такой транслятор может оказаться более удобным при его перемещении по обрабатываемой поверхности камня, однако будет иметь более тяжёлый и менее острый щуп-указатель.

Выше было описано сопряжение двух соседних блоков по одному участку. В следующем разделе будет продемонстрировано, каким образом с помощью предложенного транслятора могла создаваться полигональная кладка в целом.

### **2.10.3. Последовательность обработки транслятором каменных блоков в полигональной кладке**

Вначале обработке подвергаются каменные блоки, образующие первый ряд кладки. Для первого блока первого ряда берётся камень произвольной формы (см. Рис. 5, поз. 1), в котором формируют боковые грани (основание, верхняя сторона и боковые стороны) (поз. 2). Обработка боковых граней является произвольной – исходная неправильная боковая поверхность природного камня заменяется совокупностью приблизительно плоских граней. В дальнейшем эти грани больше обрабатываться не будут. Полученный в результате обработки блок кладётся на землю тыльной стороной. В последствии обработка, подгонка и проверка качества сопряжения соседних блоков будут осуществляться при данном положении блоков.

Для второго блока первого ряда берётся следующий камень произвольной формы, в котором изготавливают основание. Затем блок размещают рядом с первым блоком (поз. 3), между блоками устанавливают транслятор, с помощью которого переносят рельеф с боковой грани первого блока на боковую грань второго блока (копируемый участок показан жирной линией). Транслятор на Рис. 5 представлен схематично. Чтобы не перегружать рисунок деталями, передвижения несущего стержня по обрабатываемому участку, связанные с исчерпанием диапазона действия транслятора, здесь и далее не показаны.

После изготовления участка сопряжения блоки стыкуют (поз. 4). После этого на оставшейся боковой поверхности каменной заготовки блока 2 формируют остальные (произвольные) грани этого блока (поз. 5). Как и ранее, обработка этих граней представляет собой спрямление сложной исходной формы каменной заготовки близкими к плоскостям поверхностями. Перечисленные выше шаги повторяют для третьего, четвёртого (поз. 5-10) и, если требуется, последующих блоков первого ряда. Закончив построение первого ряда, приступают к изготовлению второго ряда кладки (блок 5, поз. 11).

В отличие от блоков первого ряда, где стыковка соседних камней происходила обычно по одному боковому участку, блоки второго и последующих рядов стыкуются по более чем одному участку. Как правило, стыковка этих блоков производится по основанию и участку боковой поверхности, примыкающему к основанию (поз. 11). Для выполнения подобного совмещения в измерительный стержень вкручивают прямолинейные наконечники. Отметим, что участки сопряжения между блоками только изображены на Рис. 5 как прямолинейные. На практике все подобные участки являются криволинейными в большей или меньшей степени. После завершения обработки блока 5 и проверки качества его сопряжения (поз. 13), блок 1 можно извлекать из временной кладки (поз. 14) и передавать для окончательной сборки стены (поз. 22). Обработка блока 6 подобна обработке блока 5 (поз. 14-16).

Обработка блока 7 под U-образную выемку состоит из двух этапов. Вначале копируется половина U-выемки, которая представляет собой первую L-образную выемку (поз. 16). Затем обработка U-образной выемки продолжается на второй (встречной) L-образной выемке (поз. 17). Обработка первой L-выемки (поз. 16) может быть выполнена как с помощью прямых наконечников, так и изогнутых (на Рис. 5 оба типа наконечников для наглядности показаны вместе). Обработка второй L-выемки (поз. 17) выполняется с помощью изогнутых наконечников, развёрнутых примерно на 180°. Отметим, что в ходе обработки первой и второй L-образных выемок ориентация транслятора в пространстве должна оставаться неизменной.

Таким образом, если изначально при обработке U-образной выемки в измерительный стержень были вкручены прямые наконечники, то на втором этапе их следует заменить

## Способы изготовления полигональной кладки в мегалитических комплексах Перу

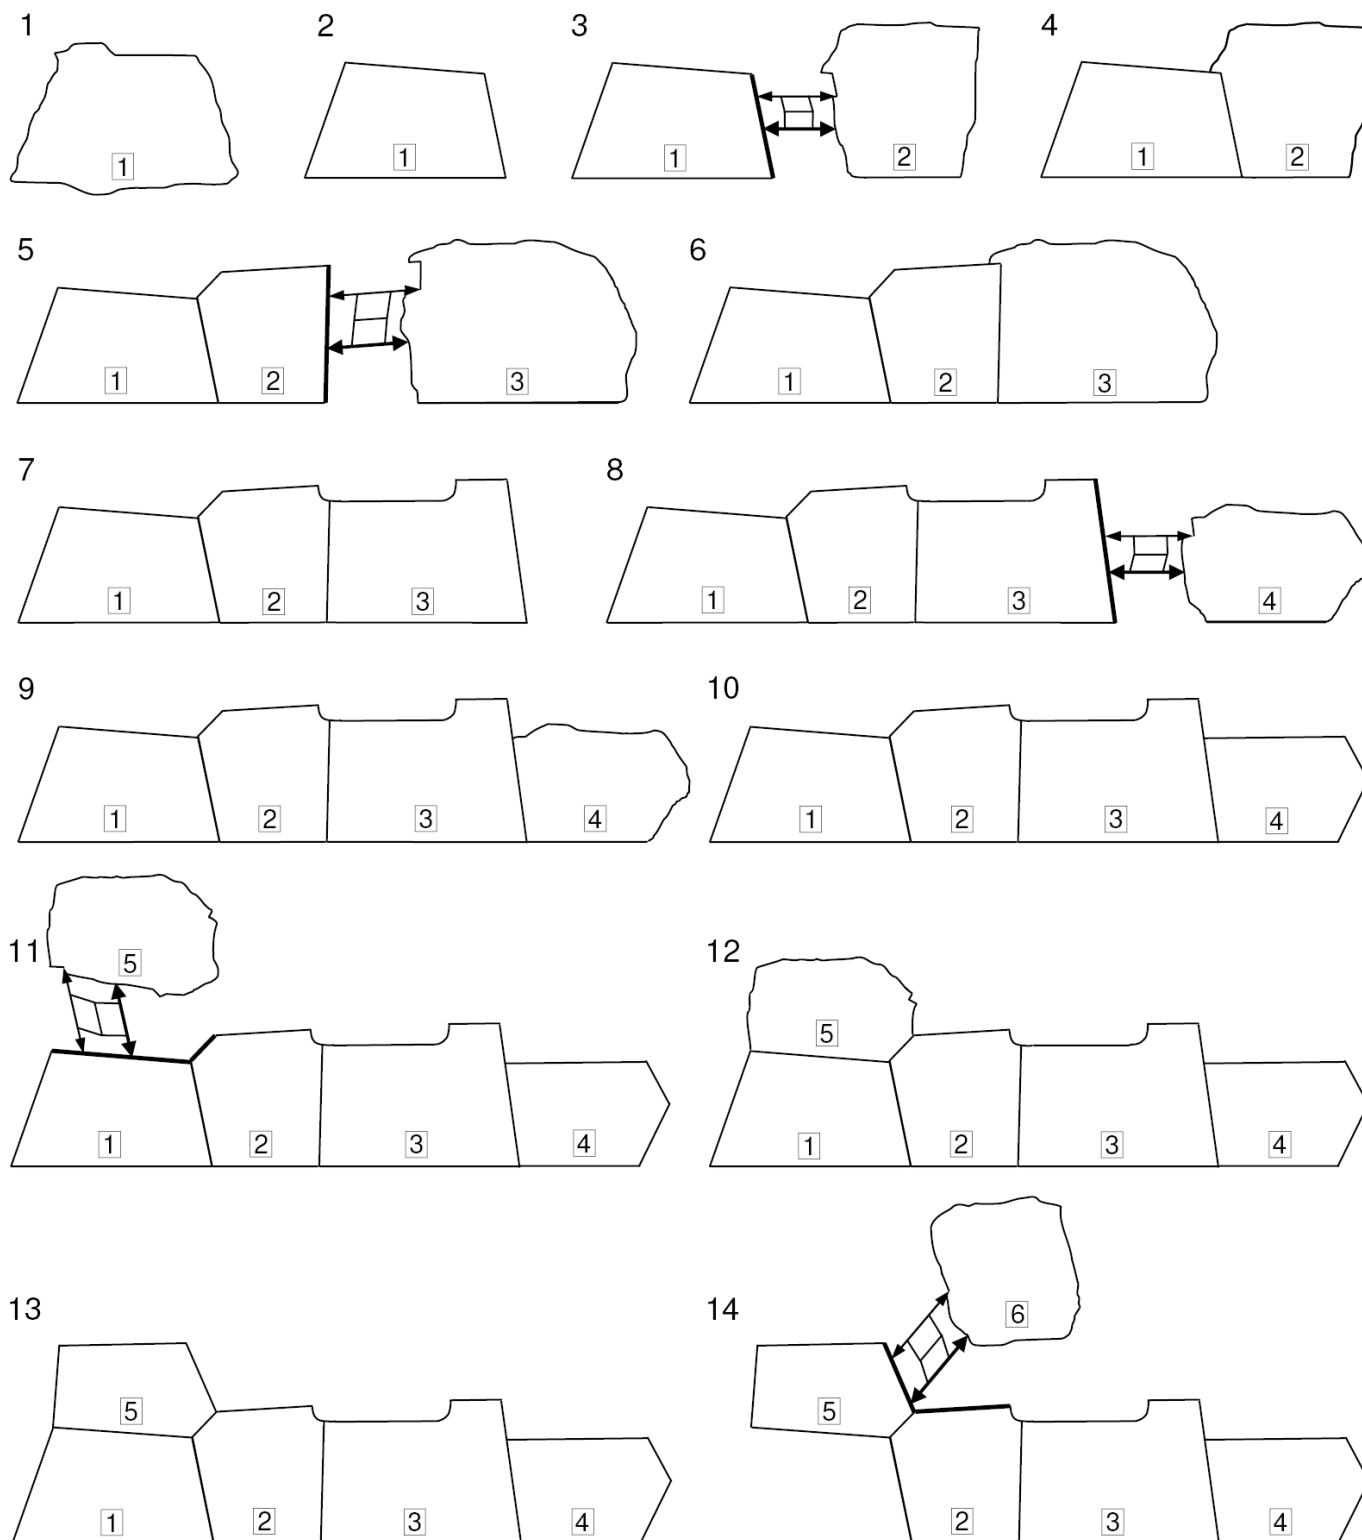

Рис. 5. Последовательность обработки каменных блоков с использованием транслятора рельефа. Полигональная кладка представлена восемью блоками, уложенными в два ряда по четыре блока в каждом ряду. Участки, по которым выполняется совмещение, показаны жирной линией. Каменные блоки лежат на земле тыльной стороной вниз. Транслятор изображен в упрощённом виде. Передвижения несущего стержня по обрабатываемой поверхности, связанные с исчерпанием диапазона действия транслятора, не показаны. Для обработки U-образных выемок, вместо прямолинейных в измерительный стержень вкручиваются изогнутые наконечники.

на изогнутые (заданное расстояние между концами зонда и указателя при этом должно оставаться неизменным). Если изначально при обработке U-образной выемки в измерительный стержень были вкручены изогнутые наконечники, то на втором этапе их следует развернуть примерно на  $180^\circ$ .

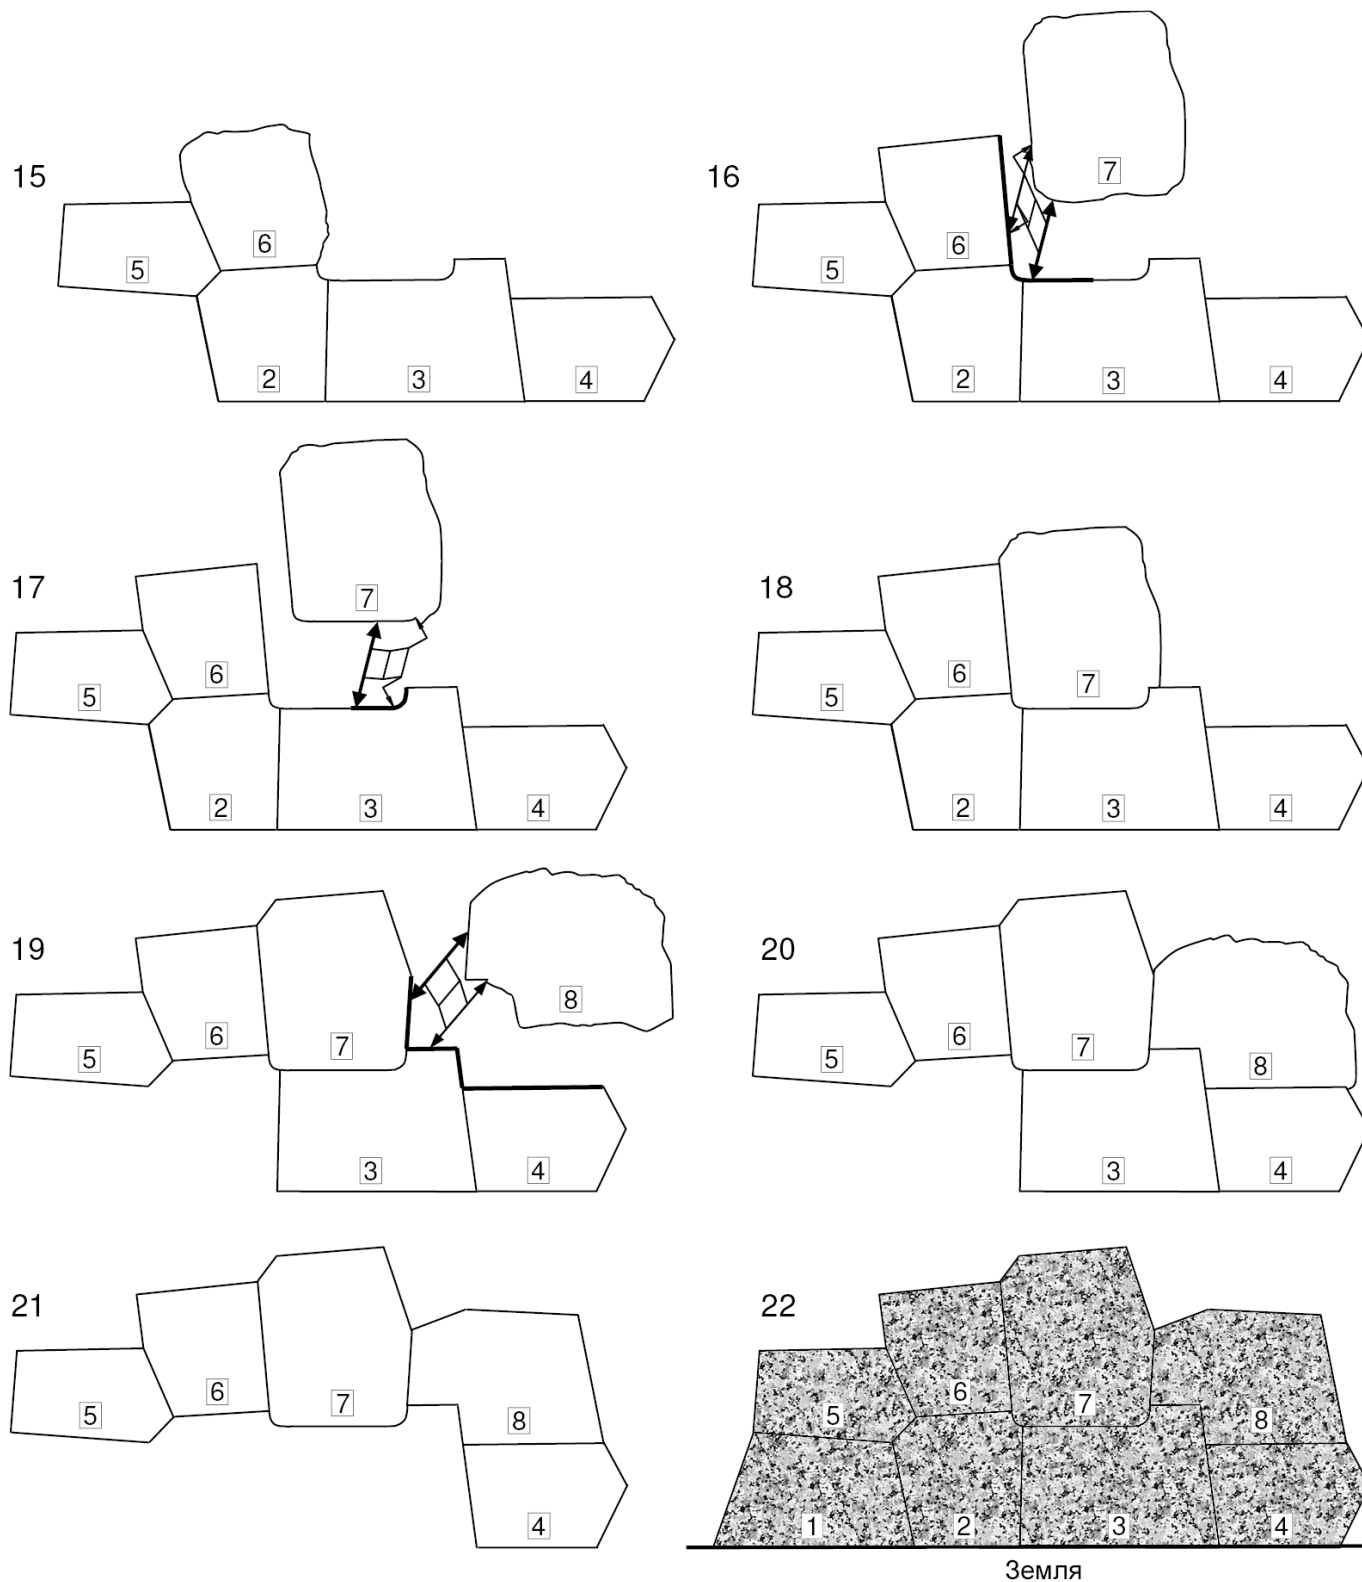

Рис. 5. Продолжение.

При большом количестве U-образных выемок в кладке удобно пользоваться транслятором рельефа, у которого измерительный стержень имеет цилиндрические шарниры, обеспечивающие ему свободное вращение вокруг своей оси (см. Рис. 4б). В этом случае настройка положения изогнутых наконечников измерительного стержня для работы на первой и второй L-образных выемках фактически сводится к повороту измерительного стержня вокруг своей оси на подходящий в данном месте угол. Установив блок 7 на своё место (поз. 18), оставшаяся боковая поверхность этого блока подвергается произвольной обработке (поз. 19). Закончив работу с блоком 7, блок 2 может быть извлечён из временной кладки (поз. 19) и перемещён к месту возведения полигональной стены для окончательной установки (поз. 22).

Подгонка блока 8 (поз. 19-21) понятна из рисунка. При необходимости третий и последующие ряды полигональной кладки изготавливаются аналогично тому, как изготавливался второй ряд кладки. Окончательный вид стены, состоящей из восьми блоков, уложенных в два ряда, показан на рисунке (поз. 22).

### **2.10.4. Особенности применения транслятора рельефа**

Работа предложенного приспособления базируется на хорошо известном принципе сопряжения двух поверхностей. В качестве примера использования данного принципа для обработки каменных блоков, образующих полигональную кладку, можно привести работу 10. В отличие от способа 10 благодаря двойному параллелограммному механизму рабочее положение в пространстве предложенного транслятора рельефа может быть любым.

На практике наиболее удобными положениями являются положения транслятора близкие к горизонтальному, так как они позволяют каменщику обрабатывать вертикально расположенные сопрягаемые поверхности каменных блоков, лежащих на земле напротив друг друга. Лицевая поверхность каменного блока располагается горизонтально и также полностью доступна для обработки. Более того, подогнанные предлагаемым способом блоки можно стыковать в таком положении друг с другом (применяя подпорные камушки), что позволяет перед укладкой блоков в стену проверять качество выполненных сопряжений.

В способе 10 из-за привязки измерительного стержня к вертикали при помощи отвеса, каменщик для обработки верхней стороны блока предыдущего ряда вынужден расположить блок текущего ряда, по основанию которого производится подгонка, над блоком предыдущего ряда, что небезопасно и требует больших дополнительных усилий. В частности, необходимо предусмотреть упоры (выемки или выступы) на каменных блоках, изготовить брёвна-упоры, заглубить брёвна-упоры в землю, в начале работы поместить каменные блоки на брёвна-упоры, а после окончания работы снять их с брёвен-упоров. При этом для доступа к обрабатываемой поверхности с лицевой стороны стены и для доступа к самой лицевой стороне требуются помосты, леса и т. п. Кроме того, использование в способе 10 отвеса, заметно снижает производительность работы каменщика, так как в ходе обработки поверхности блока на успокоение отвеса затрачивается довольно много времени. Помимо этого, само использование отвеса бывает сильно затруднено в случае сильного ветра.

Винсент Ли, автор работы 10, первоначально отталкивался от того, что полигональная кладка в перуанских мегалитических сооружениях создавалась руками индейцев. В соответствии с этой изначальной посылкой, Винсент Ли был вынужден использовать отвес, как самый простой измерительный инструмент, который мог быть известен индейцам в то время. Кроме того, автор хотел в предлагаемом им способе создания полигональной кладки как-то задействовать имеющиеся на каменных блоках крепости Саксайуаман выступы/выемки. Отсюда возникла крайне затратная по прикладываемым усилиям схема расположения обрабатываемых каменных блоков один над другим.

В предлагаемом способе, параллельное перемещение измерительного стержня никак не связано с нормалью к поверхности земли и может происходить при любой ориентации транслятора. Поэтому подгонка блоков и их предборка производятся, когда текущий и предыдущий ряды блоков лежат на земле своей тыльной стороной вниз. Только завершив укладку блоков текущего ряда на земле, блоки предыдущего ряда можно устанавливать на их места в строящейся стене. Поэтому в предложенном способе нет необходимости проводить обработку камней на самой возводимой стене в стеснённых условиях и с риском для жизни.

Обработка сопрягаемых поверхностей на смежных участках с резкой границей, и на смежных участках с плавной границей (например, в виде L- и U-образных выемок) выполняется в один приём. При этом ориентация в пространстве несущего/измерительного стержня и расстояние между кончиками зонда и указателя измерительного стержня оста-

ются всё время неизменными. При переходе на участок встречной L-выемки во время переноса U-образных выемок требуется замена прямых наконечников измерительного стержня на изогнутые или соответствующий разворот изогнутых наконечников, если таковые использовались изначально.

В ходе обработки сопрягаемых поверхностей каменных блоков транслятор рельефа часто располагается под углами к этим поверхностям, значительно отличающимися от нормали (см. Рис. 5). Такое расположение транслятора в случае достаточно острого зонда и указателя вызывает незначительную дополнительную погрешность переноса рельефа. Чем сильнее отклонение от нормали и больше радиусы закругления острий щупа и указателя, тем величина этой погрешности больше.

Описанный в настоящей работе способ подгонки блоков мог быть задействован при возведении стен со сравнительно простой полигональной кладкой, где сопрягаемые участки поверхности имеют небольшую кривизну, нет фигурных заострений или резких ступенек в местах тройных стыков (нет “ощущения лепки”, см. следующий раздел). Так как в рассмотренном способе производится последовательная подгонка блоков “по месту”, то признаком применения данного способа будет являться установка больших блоков в первом ряду кладки непосредственно на уплотнённый грунт или на предварительно подготовленное скальное основание, т. е. без использования небольших “юстировочных” блоков в первом ряду кладки, обеспечивающих правильное взаимное положение крупных блоков второго и последующих рядов (см. подробнее в разделе 2.1).

Другим признаком применения транслятора рельефа будут являться небольшие парные расположенных строго напротив друг друга выемки (число выемок тем больше, чем больше площадь сопрягаемой поверхности). Выемки создаются в тех местах, где несущий стержень транслятора устанавливается под наклоном к сопрягаемым поверхностям на опоры с заострениями. Присутствие на одной из сопрягаемых поверхностей совокупности наложенных друг на друга кольцеобразных областей также будет являться признаком использования предложенного выше транслятора рельефа. Ещё одним признаком использования транслятора является наличие “kozyрька”, часто возникающего в ходе подгонки блоков (см. Рис. 5, поз. 4, блок 2; поз. 6, блок 3; поз. 18, блок 7; поз. 20, блок 8). Изредка подобные козырьки встречаются на незавершенных блоках, являясь, в свою очередь, признаком незавершенности блока.<sup>23</sup>

В заключении отметим, что основным преимуществом предложенного способа является то, что половина сопрягаемых поверхностей каменных блоков обрабатывается в нём произвольно.

### **2.11. Выпуклость лицевой стороны и наплыв в нижней её части, заострения в местах тройных стыков**

Характерная выпуклость лицевой поверхности, а также наплыв в нижней её части (не путать с боссами/сосцами), обнаруживаемые в некоторых постройках (см., например, Фото. 1-4), часто служат одним из доказательств “пластичной” версии<sup>12,13,14</sup> изготовления полигональной кладки. Согласно пластичной версии не до конца затвердевшие блоки укладывались друг на друга. В результате межблочные зазоры в полигональной кладке смыкались под действием собственного веса этих блоков, а лицевая поверхность приобретала указанные выпуклость и наплыв.

В предлагаемом способе оба признака – выпуклость и наплыв могут сами собой появиться на стадии изготовления глиняной модели стены, если глиняный замес не достаточно густой и не используется какая-то ограждающая конструкция с лицевой и тыльной сторон. Выпуклость и наплыв также могут быть изготовлены намеренно в процессе лепки глиняной модели.

Скорее всего выпуклость и наплыв придавались блокам намеренно. Обе особенности усиливают ощущение массивности, грандиозности постройки, её колоссального веса; нам

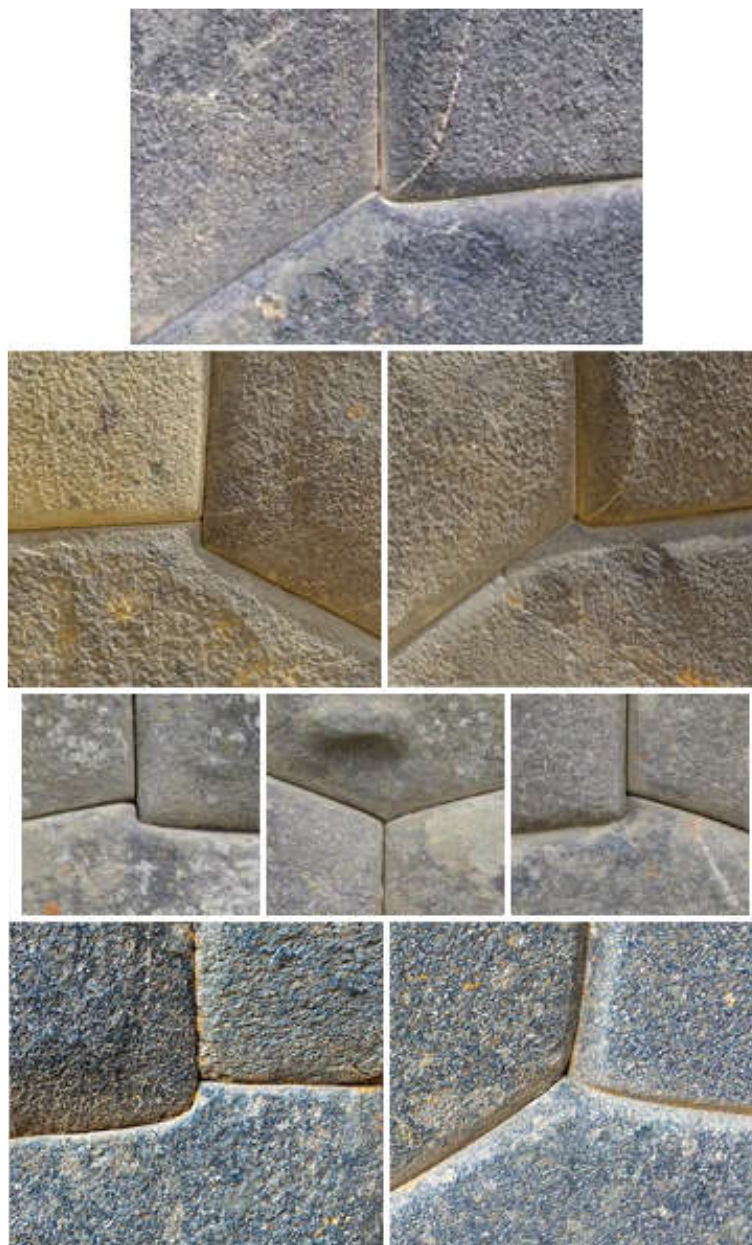

Рис. 6. “Клювики” и ступеньки.

кажется, будто камни сплюсываются под огромной тяжестью. Выпуклость также была призвана продемонстрировать наивным индейцам могущество прибывших белых, способных при необходимости “вылепливать” постройку из громадных твёрдых камней, словно из теста.

В местах, где стыкуются три смежных блока, хорошо видны заострения (“клювики”/ступеньки, см. Рис. 6). Эти элементы создаются в процессе лепки глиняной модели и затем переносятся с помощью пантографа на каменный блок. Помимо упора, ограничивающего перемещение смежного блока в горизонтальной плоскости, клювики/ступеньки придают полигональной кладке особое изящество. Клювики вместе с параллельностью плавно изменяющихся криволинейных кромок должны были по замыслу создателей придать ощущение лёгкости работы с камнем. Эти особенности заставляют зрителя думать, что блоки буквально вылеплены из камня. И надо отдать должное старым мастерам, этот приём им удался!

Учитывая сказанное выше, вместо термина “полигональная кладка” будет вполне справедливо использовать термин “полигональная скульптура” в тех случаях, когда каменная постройка создаётся на основе ручной лепки глиняной модели, выполненной в определённом художественном стиле с уникальными замковыми сопряжениями между блоками.

## 2.12. Косвенная датировка по наблюдаемым разрушениям элементов кладки

Одно из слабых в смысле прочности мест полигональной кладки это клювик. Поэтому клювики должны разрушаться в ходе естественного процесса выветривания в первую очередь. Многие камни в Перу покрыты лишайником (см. Фото. 9), поэтому при оценке скорости разрушения камня помимо выветривания должен также учитываться и биологический фактор. Удивительно, но в горах (Куско, Мачу-Пикчу, Ольянтайтамбо и др.), где климат характеризуются резкими перепадами температуры (15-20° С) в течение суток, большим количеством осадков и лёгкими заморозками зимой (июнь-август),<sup>24</sup> рассматриваемая в статье разновидность полигональной кладки прекрасно сохранились.

Помимо выветривания причиной разрушения клювиков может быть сдвиг камней в кладке при землетрясении<sup>2,3,4,5</sup> или при оползневом смещении склона<sup>4</sup> (часто провоцируется землетрясением). Следует отметить, что сколы клювиков могли возникнуть и в процессе изготовления каменных блоков, и при их транспортировке, и во время установки, и при реставрации. Некоторые из таких сколов можно частично исправить. Исправленные клювики будут выглядеть более утопленными в тело кладки, чем нормальные.

Изучение полигональных кладок из твёрдых пород (гранит, андезит, базальт) показывает, что разрушения клювиков имеются, но этих разрушений мало. Отсутствие заметных разрушений при достаточно суровых климатических условиях и высокой сейсмической активности в Перу, дают основание утверждать о сравнительно недавней порядка 300 лет постройке мегалитических комплексов. Приблизительную оценку можно получить, сравнив состояние мегалитических комплексов с памятниками из сходных материалов, дата возведения которых известна, находившихся в похожих погодно-климатических условиях.

## 2.13. Как доказать? Что и где следует искать?

Что может служить подтверждением предлагаемых способов изготовления полигональной кладки? На территории или вблизи комплексов с полигональной кладкой или в карьерах должен сохраниться строительный мусор, в котором следует искать обломки глиняных моделей блоков и обломки глиняных/гипсовых реплик. Конечно, прежде всего нужно ознакомиться с материалами, проводившихся раскопок. Возможно, какие-то подходящие по форме, размерам и материалам обломки уже были найдены и задокументированы. Большая часть обломков, скорее всего, шла на укрепление грунта под следующую возводимую постройку. Поэтому в случае перекладки какой-либо постройки, связанной с её естественным разрушением, свидетельства в виде глиняных моделей и реплик следует искать и в грунте под самой постройкой.

Если предположить, что в пантографе, используемом строителями, глиняная модель и каменная заготовка располагались так же, как и в современном пантографе, т. е. горизонтально тыльной стороной вниз (для фиксации блока в случае неровной тыльной поверхности используются подпорные камушки), то следы от зубила на боковой поверхности каменных блоков должны проходить справа на лево (зубило в левой руке, молоток в правой) и сверху вниз (в начале следа углубление больше, чем в конце). Сами следы должны представлять собой короткие параллельные штришки, расположенные вертикальными столбцами.

Следы от зубила нужно искать на каменных блоках из твёрдых пород – гранит, андезит, базальт. Мягкие породы камня, такие как известняк, имеют высокую пористость; поверхностный слой этих камней быстро разрушается выветриванием. Кроме того, следы от зубила на поверхности известняка легко уничтожаются в ходе последующей операции сглаживания обстукиванием. Поверхности сопряжения каменных блоков из твёрдых пород, которые пролежали под открытым небом вне кладки неизвестно сколько лет, также нет смысла изучать по причине выветривания. Для анализа поверхности сопряжения следует брать камни из какой-то нетронутой кладки с минимальными зазорами, в которые могло попасть очень незначительное количество влаги.

Следует отметить, что кладку из каменных блоков, которой несколько сотен лет, скорее всего, невозможно разобрать так, чтобы сохранить неповреждённым поверхностный слой камня в местах контакта. Дело в том, что в течение всего срока существования кладки в указанных выше климатических условиях в местах контакта протекали различные физико-химические процессы, вызывающие в этих местах изменение минерального состава. В результате, в зависимости от процесса в одних местах контакт мог разрушаться (с образованием песка), а в других, напротив, упрочняться. Попытка разъединения мест, где возникло упрочнение, приведёт к разрушению поверхностного слоя камня, примыкающего к контакту. В любом случае после разборки старой полигональной кладки размеры камней и их геометрия изменятся. Поэтому снова собрать старые блоки так, чтобы между ними были прежние крошечные зазоры, уже не получится.

### **2.14. Косвенная датировка по времени изобретения 3D-пантографа**

Если принять предложенную версию изготовления полигональной кладки с помощью пантографа, то можно приблизительно датировать постройки “невероятно” древних Инков годами изобретения/постройки пантографов европейцами. Пантограф для работы с плоским рисунком изобретён в 1603-1605 годах Кристофом Шейнером.<sup>25</sup> Отметим, что информация об устройстве этого пантографа была опубликована автором в виде отдельной книги<sup>26</sup> только спустя 28 лет после изобретения.

Примерно в 1710-1720 годах русскими механиками Францем Зингером и Андреем Нартовым<sup>27</sup> был построен токарно-копировальный медальерный станок.<sup>28,29</sup> Станок предназначался для изготовления в автоматическом режиме медалей путём переноса рельефа с модели медали большого размера. Сравнить станок Зингера-Нартова с современным 3D-пантографом, используемым скульпторами (см. Рис. 2), не совсем корректно, так как кинематические схемы этих механизмов сильно различаются. Несмотря на это, следует обратить внимание на сложность механизма станка, которая заметно превосходит сложность механизма современного пантографа. В частности, в 3D-пантографе перемещение щупа по поверхности модели и приложение режущего инструмента к поверхности заготовки осуществляются скульптором вручную, тогда как в приводимом примере станка эти функции реализуются без участия человека. Отметим, что в 18 веке копировальные станки подобные данному строились и использовались во многих европейских странах.

В 1807 году Джеймс Уатт<sup>30</sup> приступил к созданию механизма,<sup>31</sup> предназначенного для получения уменьшенных копий скульптур.<sup>32</sup> Кинематическая схема механизма Уатта близка к кинематической схеме современного 3D-пантографа. Однако имеется ряд отличий. Вместо шарового шарнира стрела установлена на карданном шарнире; отсутствует параллелограммный механизм; модель и её уменьшенная копия расположены горизонтально и др.

Наиболее близким по кинематической схеме к современному 3D-пантографу (см. Рис. 2) является пантограф, построенный в 1826 году Бенжамином Чевертоном.<sup>33</sup> При постройке своего пантографа Чевертон опирался на конструкцию, ранее предложенную Джоном Хокинсом.<sup>34</sup> Так же как и пантограф Уатта, пантограф Хокинса-Чевертона предназначался для получения уменьшенных копий скульптур.

Следует отметить, что и пантограф Уатта, и пантограф Хокинса-Чевертона имели встроенный гравёр, фрезой которого выполнялась механическая обработка заготовки. Гравёр в рассмотренных выше способах создания полигональной кладки не требуется. Поэтому конструктивно строительный пантограф проще пантографов Уатта и Хокинса-Чевертона. На рисунке изображено ателье второй половины 19 века, в котором с помощью 3D-пантографа выполнялось массовое копирование статуй.<sup>35</sup>

Нет сомнения, что, создав 2D-пантограф в начале 17 века, учёные того времени и, прежде всего, сам изобретатель 2D-пантографа Кристоф Шейнер сразу же задумались над созданием механизма 3D-пантографа, с помощью которого было бы возможно получить

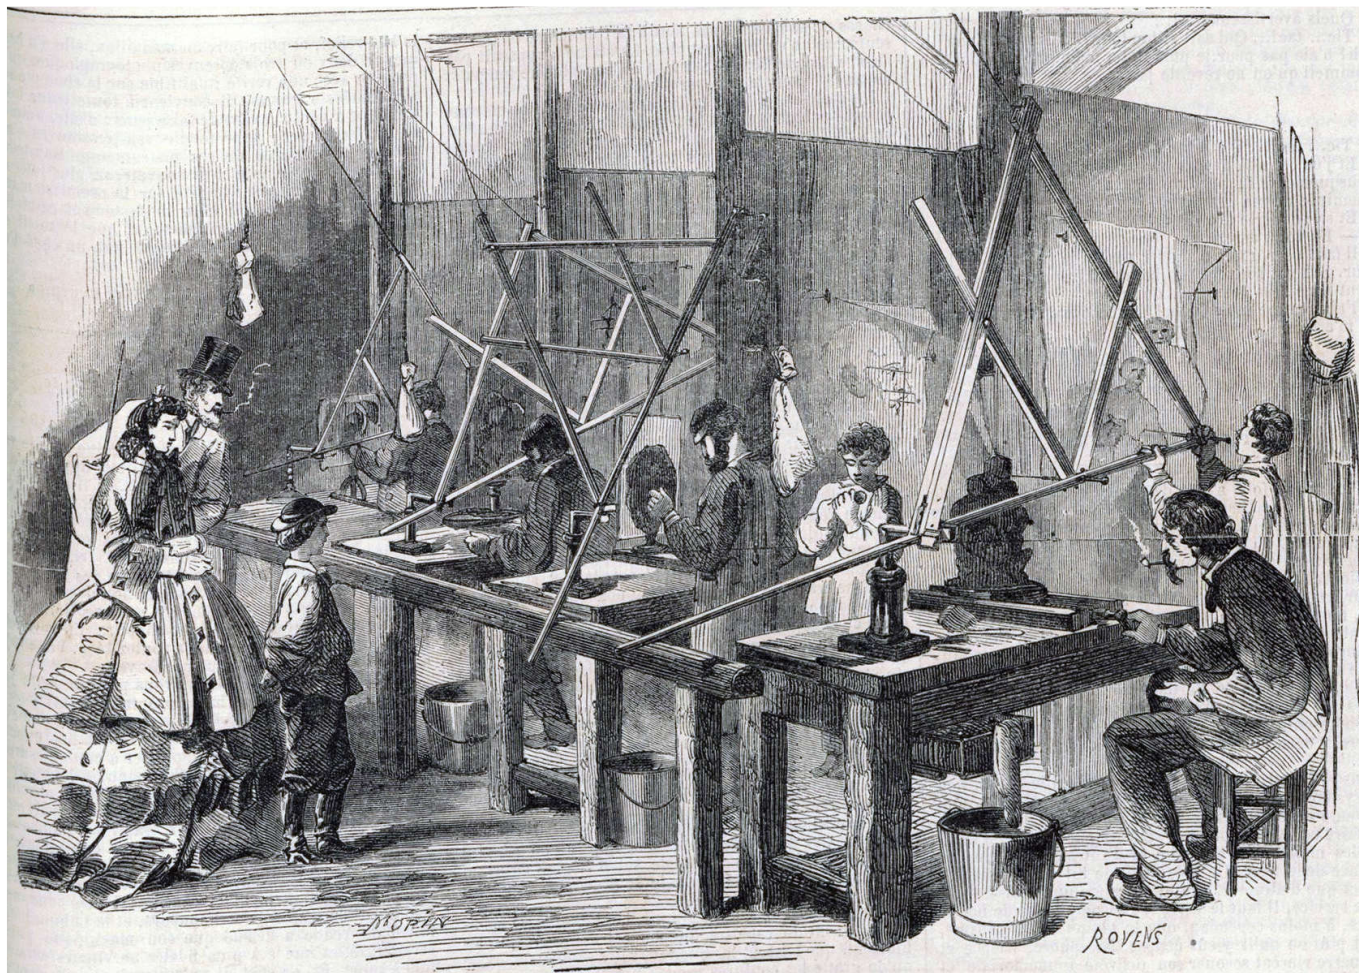

Ателье 19 века по копированию статуй с помощью 3D-пантографа (рисунок тушью, художники Е. Morin и Е. Rovens, 1864).

уменьшенные/увеличенные копии трёхмерных объектов. Собственно, для перехода к работе с трёхмерными объектами 2D-пантограф всего лишь следовало закрепить не в цилиндрическом, а в шаровом шарнире; параллелограммному механизму дать возможность свободно вращаться вокруг установленного в шаровом шарнире плеча (стрелы пантографа), а модель и заготовку снабдить способностью синхронного поворота вокруг своих вертикальных осей посредством цепной (см. Рис. 2) или зубчатой<sup>33</sup> передач.

В строительном пантографе применение цепной передачи более оправдано, чем зубчатой. Дело в том, что из-за больших размеров и веса обрабатываемых каменных блоков размеры и вес используемых зубчатых колёс тоже оказываются большими. Кроме того, цепная передача позволяет легко изменять расстояние между поворотными платформами, которое отвечает за коэффициент уменьшения/увеличения пантографа. Изменение расстояния осуществляется путём смещения платформ вдоль рамы. Для этого к цепи добавляется или из цепи изымается соответствующее число звеньев и/или цепь натягивается роликом, расположенным на конце подпружиненной консоли. Коэффициент уменьшения/увеличения при этом оказывается практически непрерывной величиной. Для изменения расстояния в случае зубчатой передачи установленный комплект колёс заменяется наиболее подходящим из имеющихся комплектов, количество которых обычно ограничено. Поэтому коэффициент уменьшения/увеличения оказывается существенно дискретным.

Анализируя механизмы подобные станку Зингера-Нартова, можно сделать вывод о том, что разработка и постройка 3D-пантографа современной конструкции с точки зрения сложности кинематической схемы, технологии металлообработки и используемых материалов была вполне по силам механикам уже в начале 18 века. К тому времени все проблемы, связанные с точностью копирования, а именно: зазоры в шаровом и цилиндриче-

ских бронзовых шарнирах, люфты в цепной/зубчатой передаче, а также жёсткость стрелы и рамы (требуется для поддержания неизменным относительного расположения элементов пантографа в процессе функционирования), уже были успешно решены. Поэтому очень странно, что для создания 3D-пантографа потребовалось так много времени – более 220 лет!

В настоящий момент у нас пока нет ни письменных, ни материальных свидетельств, подтверждающих существования строительного 3D-пантографа в 18 веке. Как бы там ни было, учитывая уровень техники того времени, нельзя исключить возможности того, что такой пантограф мог быть разработан, построен и нашёл ограниченное применение в строительстве, но сам изобретатель и его пантограф остались при этом неизвестны широкому кругу специалистов. Дело в том, что мастера-каменщики в те времена не спешили раскрывать свои профессиональные секреты. Судя по тому, как долго просуществовала загадка создания полигональной кладки, мастера-каменщики умели хранить свои секреты хорошо.

### **2.15. Кто строил, когда и на какие средства?**

Проблема с постройками, выполненными на основе полигональной кладки, состоит в следующем. Официальная история утверждает, что постройки существовали до прибытия европейцев в Новый Свет в 16 веке, и американские индейцы не знали на тот момент ни железных орудий, ни колеса и не имели тягловых животных. Из такой постановки следует один единственный вывод: постройки возведены, какой-то более древней цивилизацией, существовавшей в Америке до индейцев, но по культуре работы с камнем соответствующей в целом европейской строительной культуре 16-17 века.

Проблема с этой мифической более древней цивилизацией состоит в том, что она не оставила после себя никаких иных материальных свидетельств своего существования за исключением безупречно выполненных каменных построек. Как справедливо отмечено в работе 17, качественная полигональная кладка и сооружения на её основе мгновенно (по историческим меркам) возникают как бы из неоткуда, а затем также мгновенно в никуда исчезают. Нет ни предшествующего, ни последующего заметного развития архитектуры и технологии этих построек. А ведь такое происходит только тогда, когда на некоторую территорию на короткий срок, скажем, на 10 лет, заезжает группа строителей-профессионалов со своими инструментами, приспособлениями и приёмами строительства.

Быстротечность событий, происходивших в строительной сфере тех лет, указывает на высокую производительность труда строителей-гастролёров и их методов строительства. Перечисленные противоречия моментально разрешаются, если авторами построек становятся заезжие европейские строители,<sup>36,37,38,39,40</sup> а время возведения построек переносится из “минус бесконечности” в 18 век. Для доставки, перемещения и грубой обработки камней, укрепления склонов и прочих тяжёлых и не требующих никакой квалификации работ, разумеется, нагонялся местный индейский люд по приказу подчинившихся/купленных испанцами индейских вождей. Таким образом, перуанские мегалитические комплексы являются в определённом смысле постройками и Инков тоже, хотя и не столь древних.

Всякое большое строительство всегда опирается на какую-то крепкую экономическую основу. Трудно себе представить, чтобы мегалитические комплексы для индейцев возводились за счёт испанцев. Безусловно, эти комплексы создавались за счёт индейцев и на костях индейцев. Но, что могли предложить индейцы испанским колонизаторам? То золото и серебро, которое у них имелось, было захвачено в первые годы завоевания и увезено в Европу. Родить много хлопка, сахарного тростника или зерна перуанская земля была не в состоянии.

Раз золото и серебро у индейцев на момент завоевания имелось, значит, где-то они его брали. Поэтому испанцами была организована добыча золота и серебра в шахтах, рудниках и на приисках.<sup>40,41,42,43</sup> А, чтобы работа в копях шла веселее, туземное жречество вдохновляло индейский народ видом и грандиозностью мегалитических храмов, которые возводились за счёт части средств, полученных от добычи драгметаллов. Через несколько десятков лет легкодоступные месторождения золота и серебра иссякли, и строительство мегалитических комплексов остановилось. К этому моменту власть испанцев и католической церкви как-то “незаметно” усилилась, а численность индейцев каким-то “непостижимым” образом сильно подсократилась.<sup>42</sup>

Скверное питание и проживание в лачугах не прибавляла здоровья горнякам, места “силы” уже не компенсировали сил, забираемых истощающей работой в рудниках.<sup>42</sup> В общем, наступило время, когда часть заброшенных культовых построек индейцев можно было, наконец, без особых проблем пустить в дело. И эти постройки пошли в дело. Каменные блоки и части построек использовали для возведения католических соборов, монастырей, дворцов, вилл, городских и промышленных зданий.

### 3. Обсуждение

Среди материалов по теме следует отметить работу 14, автор которой предложил использовать уменьшенную гипсовую модель каменного блока, а перенос сложной геометрии поверхности и её масштабирование выполнять по нескольким опорным точкам с помощью кронциркуля. Гипсовая модель, обычно требуется для того, чтобы при изготовлении копий не изнашивать оригинальную модель из глины. При изготовлении блоков для полигональной кладки такой проблемы не возникает. Более того, при изготовлении модели блока по каменной заготовке произвольной формы, глиняная модель служит один раз и затем выбрасывается (служит болванкой для новой модели). Таким образом, для достижения требуемого результата вполне достаточно только глиняной модели блока.

Сам процесс переноса сложной геометрии модели и её масштабирование по немногим опорным точкам с помощью кронциркуля очень трудоёмкий и неточный. Однако этот процесс перестаёт быть таковым, если вместо кронциркуля используется пантограф. Анализ показывает, что в большинстве случаев сначала по каменной заготовке произвольной формы с помощью пантографа создавалась её уменьшенная глиняная модель. Затем в глиняной модели блока вырезались места под сопряжения с соседними блоками. После чего из модельных блоков собиралась модельная стена. После сушки стена разбиралась, и места сопряжения модельных блоков с помощью пантографа переносились на свои каменные заготовки. Поскольку в строительстве, как, впрочем, и в любой другой сфере нет универсальных решений, то помимо пантографа строители пользовались приёмами, основанными на применении транслятора рельефа и реплик.

#### 3.1. Феномен “уставших” камней

Пока без ответа остаётся ряд вопросов, касающихся феномена “уставших” камней. Уставшие камни разбросаны в живописном беспорядке вдоль дороги, ведущей из карьера в крепость Ольянтайтамбо.<sup>8,9</sup> Как уставшие камни смогли пролежать не одну сотню лет на обочине дороги (некоторые на дороге) и никуда не пропасть? Индейцы не поклонялись каменным параллелепипедам. Вот, если бы в этих параллелепипедах были изготовлены, скажем, ниши, тогда другое дело. Между тем, в конец обессилившие камни и по сей день с невероятным упорством продолжают указывать нам путь к карьере, где добывались блоки для крепости. Почему в горной стране, где камень используется для строительства всего – зданий, мостов, дорог, эти абсолютно выбившиеся из сил камни так удобно расположенные на обочине дороги – бери и используй, никем до сих пор не были расколоты на более мелкие части и не пущены в дело? Большинство из этих камней колется в течение одного дня усилиями одного опытного каменщика. Но, нет, мы видим полную сохранность и неуязвимость данных камней. Получается, что местные власти на протяжении

всех этих сотен лет почему-то строго следили за тем, чтобы данные каменные блоки никто не трогал.

### **3.2. Полигональная облицовка барельефом**

Помимо простой обработки лицевых сторон каменных блоков рассмотренная в статье технология позволяет создавать полигональную кладку (облицовку), лицевая поверхность которой представляет собой барельеф. Примером, где могла быть применена подобная технология кладки/облицовки, является камбоджийский храмовый комплекс Ангкор.<sup>44</sup>

### **3.3. Изготовление с помощью пантографа симметричных статуй**

Способ литья, при котором вначале отливается болванка (цельная или полая) из дешёвого бетона, а затем после окончания её усадки поверх отливается сравнительно тонкая оболочка (слой “штукатурки”) из более дорого искусственного гранита, из-за своей сложности не подходит для масштабного полигонального строительства, в котором все каменные блоки разные. Между тем, данный способ отлично подходит как для изготовления одиночных уникальных статуй, так и для массового изготовления одинаковых статуй.

Например, некоторые “древнеегипетские” статуи фараонов и сфинксов, покрытые слоем штукатурки из искусственного камня (гранит, долерит), по всей видимости, были изготовлены по такой технологии.<sup>45</sup> Поскольку среди некоторых “древнеегипетских” статуй встречаются статуи, отличающиеся только размерами, то можно предположить, что и эти статуи создавались по одной и той же исходной модели с использованием пантографа, настраиваемого на разные коэффициенты увеличения.

Ряд исследователей давно обратили внимание на практически совершенную симметрию (лицо, головной убор, торс) некоторых египетских статуй (Рамзес II, Аменхотеп III, Нефертити).<sup>46</sup> Вопрос о том, как эта симметрия была достигнута, долгое время оставался открытым. Между тем, небольшая модификация механизма пантографа позволяет изготавливать статуи с высокой степенью симметрии левой и правой сторон.<sup>45</sup> Покажем, как это достигалось на практике.

Вначале, как обычно, по уменьшенной глиняной модели с помощью пантографа скульптор создаёт увеличенную глиняную модель. После этого 0-образная цепь в пантографе заменяется на 8-образную. В результате данной модификации платформа с уменьшенной моделью статуи и платформа с увеличенной моделью статуи будут вращаться во взаимно противоположных направлениях. Если используется пантограф, в котором для привода платформ вместо цепи применяется промежуточное зубчатое колесо<sup>33</sup> (в общем случае нечётное число одинаковых промежуточных зубчатых колёс), то вместо этого колеса следует установить пару одинаковых промежуточных зубчатых колёс (в общем случае чётное число одинаковых промежуточных зубчатых колёс) или вообще исключить промежуточные колёса.

Теперь скульптор, основываясь на художественных достоинствах левой и правой половин уменьшенной модели статуи, должен решить, какую из сторон статуи он хочет в точности скопировать на другую её сторону. Определившись со стороной, пусть для определённости это будет левая сторона, скульптор прикладывает щуп к левой стороне уменьшенной модели (щуп при этом должен оставаться перпендикулярным стреле пантографа). Тогда, указатель пантографа покажет в пространстве соответствующую точку на правой стороне увеличенной модели. Если в указываемой точке имеется избыток глины, то он убирается непосредственно указателем пантографа; если недостаток, то необходимое количество глины скульптор в эту точку добавляет. Для того чтобы пользоваться пантографом при углах щупа/указателя к стреле пантографа отличных от нормального (общий случай), параллелограммный механизм следует заменить на антипараллелограммный<sup>18</sup> механизм. Для этого длинные рейки параллелограмма всего лишь нужно переместить на место диагоналей параллелограмма.

В результате указанных модификаций пантографа получается скульптура, левые и правые стороны обладают высокой симметрией. Отклонения от симметрии в такой скульптуре определяются погрешностью работы механизма пантографа. Для уменьшения влияния погрешности пантографа работу по симметризации, например, головы следует начинать с кончика носа, где погрешность будет нулевая, и заканчивать на затылке, где погрешность окажется наибольшей, но наименее заметной. Отметим, что постепенное увеличение нарушения симметрии от носа к затылку будет являться признаком использования технологии, базирующейся на применении 3D-пантографа.

Существует несколько полигональных построек, в которых имеются короткие участки кладки с симметричным расположением блоков (Саксайуаман, Ольянтайтамбо). Однако, симметричность на этих участках только приблизительная. Блоки с левой и с правой стороны от вертикальной оси симметрии не являются полностью зеркально-симметричными, они отличаются и по форме, и по размерам. Таким образом, обеспечиваемая 3D-пантографом техническая возможность создания полигональных кладок с зеркально-симметричными участками строителям полигональных комплексов либо была на тот момент неизвестна, либо просто не использовалась.

Знания, накопленные в области механики, и уровень технологии, достигнутые к началу 18 века, вполне позволяли сконструировать и построить 3D-пантограф, пригодный для нужд строительства. Поэтому, если принять предложенный в статье способ создания полигональной кладки, то строительство ряда мегалитических комплексов Перу следует датировать не ранее начала 18 века. Также не ранее как началом 18 века следует, по-видимому, датировать камбоджийский храмовый комплекс Ангкор и ряд “древнеегипетских” скульптур.

## Фотографии

На фотографиях представлены полигональные кладки, которые могут быть получены с помощью предложенных в статье способов. Отличительные черты этих кладок: каменные блоки большие весом от нескольких сотен килограмм до нескольких тонн, блоки сопрягаются друг с другом вплотную без зазора через сложные криволинейные протяжённые поверхности.

## Благодарности

Автор выражает благодарность О. В. Объедкову, профессору И. К. Фоменко, О. Э. Ляпину, к. т. н. В. М. Сороке и Д. В. Писаренко за критическое прочтение рукописи и помощь, оказанную при проведении данного исследования.

## Материалы по теме

1. [Полигональная кладка](#), Википедия.
2. [Землетрясения в Перу](#), Википедия.
3. С. Cuadra, “[Dynamic characteristics of Inca’s stone masonry](#)”, ch. 15, pp. 421-460 in book “[Masonry construction in active seismic regions](#)” (series in civil and structural engineering), edited by R. Rupakhety, D. Gautam, Woodhead Publishing, 466 pp., 2021.
4. M. A. Rodríguez-Pascua, C. Benavente Escobar, L. Rosell Guevara, C. Grützner, L. Audin, R. Walker, B. García, E. Aguirre, “[Did earthquakes strike Machu Picchu?](#)”, Journal of Seismology, vol. 24, pp. 883-895, 2020.
5. K-G. Hinzen, A. Montabert, “[Rectangular blocks vs polygonal walls in archaeoseismology](#)”, Annals of Geophysics, vol. 60, no. 4. pp. S0443-0460, 2017.
6. [Polygonal wall](#) in [Delphi](#), Greece, Wikipedia.
7. O. J. Outwater, “[Building the fortress of Ollantaytambo](#)”, Archaeology, vol. 12, no. 1, pp. 26-32, 1959.
8. J.-P. Protzen, “[Inca quarrying and stonecutting](#)”, Journal of the Society of Architectural Historians, vol. 44, no. 2, pp. 161-182, 1985.

9. J.-P. Protzen, [“Inca architecture and construction at Ollantaytambo”](#), Oxford University Press, 303 pp., New York, Oxford, 1993.
10. V. R. Lee, [“The building of Sacsahuaman”](#), Journal of Andean Archaeology (Ñawpa Pacha), vol. 24, iss. 1, pp. 49-60, 1986.
11. Е. М. Шилин, [“Полигональная кладка в Перу в Южной Америке – частный взгляд архитектора”](#), Проекты-кирпичных-домов.рф.
12. Александр, [“Полигональная кладка: дачные технологии”](#), YouTube, 2015.
13. Александр, [“Полигональная кладка: дачные технологии II”](#), YouTube, 2016.
14. Разгадки истории, [“Как делали полигональную кладку?”](#), YouTube, 2019.
15. Александр Таманский, [“Мегалиты инков, полигональная кладка и ложь историков”](#), YouTube, 2021.
16. [Pantograph](#), Wikipedia.
17. GRESAR, [“Следы чужих технологий”](#), серии 1-8, YouTube, 2019-2021.
18. И. И. Артоболевский, [“Механизмы в современной технике: Справочное пособие для инженеров, конструкторов и изобретателей”](#), том 1, издание второе, переработанное, Наука, Москва, 1979.
19. M. Rogińska-Nieśluchowska, [“The pantograph and its geometric transformations – a former popular tool for copying and scaling”](#), The Journal of Polish Society for Geometry and Engineering Graphics, vol. 29, pp. 59-65, 2016.
20. Michael Keropian, [“3D Pantograph enlarging”](#), parts 1-7, YouTube, 2018.
21. Michael Keropian, [“Enlarging and reducing sculpture, 3D pantograph”](#), [Michael Keropian Sculpture](#).
22. Председатель СНТ, [“Кто на самом деле строил Кронштадт?”](#), YouTube, 2019.
23. J.-P. Protzen, [“The fortress of Saqsá Waman: was it ever finished?”](#), Journal of Andean Archaeology (Ñawpa Pacha), vol. 25, iss. 1, pp. 155-175, 1987.
24. [Климат Перу](#), Википедия.
25. [Кристоф Шейнер](#), Википедия.
26. C. Scheiner, [“Pantographice seu ars delineandi res quaslibet per parallelogrammum lineare seu cavum, mechanicum, mobile”](#), Typographia Ludouici Grignani, 108 pp., Rome, 1631 (на латыни).
27. [Андрей Константинович Нартов](#), Википедия.
28. [Токарно-копировальный медальерный станок](#), Государственный Эрмитаж, Санкт-Петербург.
29. В. В. Данилевский, [“Нартов и “Ясное зрелище машин””](#), под редакцией А. С. Бриткина, Машгиз, 271 стр., Москва, Ленинград, 1958.
30. [Джеймс Уатт](#), Википедия.
31. [Reducing sculpture copying machine](#), Science Museum, London.
32. J. P. Muirhead, [“The life of James Watt, with selections from his correspondence”](#), pp. 454-466, 2nd revised edition, John Murray, 572 pp., London, 1859.
33. [Machine for reproducing sculpture](#), Science Museum, London.
34. [John I. Hawkins](#), Wikipedia.
35. T. Gauthier, [“Photosculpture”](#), Le Monde illustré, pp. 396-398, December 17, 1864 (на французском).
36. Александр Таманский, [“Кто и когда построил египетские пирамиды?”](#), YouTube, 2020.
37. Александр Таманский, [“Как построили египетские пирамиды?”](#), YouTube, 2021.
38. Александр Таманский, [“Кто построил американские пирамиды?”](#), YouTube, 2021.
39. Александр Таманский, [“Римские дороги доколумбовой Америки”](#), YouTube, 2021.
40. Александр Таманский, [“Американское серебро в римских монетах”](#), YouTube, 2021.
41. [Global silver trade from the 16th to 19th centuries](#), Wikipedia.
42. P. Bakewell, [“Miners of the Red Mountain: Indian labor in Potosí, 1545-1650”](#), University of New Mexico Press, 213 pp., Albuquerque, 1984.
43. J. J. TePaske, [“A new world of gold and silver”](#), edited by K. W. Brown, Brill, 340 pp., Leiden, Boston, 2010.

44. [Ангкор](#), Википедия.
45. Р. В. Лапшин, “Как неизвестный скульптор смог добиться совершенной симметрии лица египетского фараона Рамзеса II?” (готовится к публикации).
46. С. Dunn, “[Lost technologies of ancient Egypt: advanced engineering in the temples of the pharaohs](#)”, Bear & Company, 400 pp., 2010.
